# Supplementary material
Source: PubMed Central journal article supplement (PMC4558668)
Supplement: supp_tpc.114.135582_tpc135582_SupplementalData.pdf [file supp_tpc.114.135582_tpc135582_SupplementalData.pdf]

## Supplemental Data

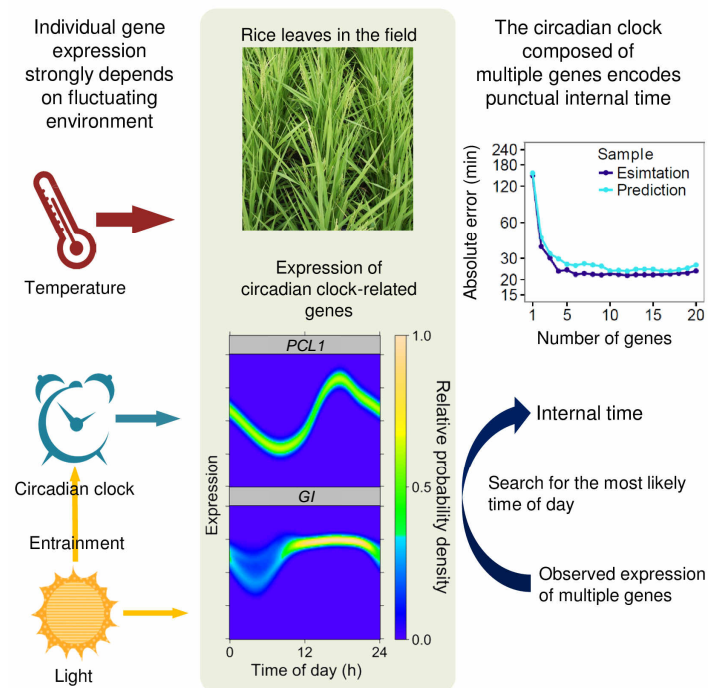

### Supplemental Figure 1. Major findings and outline of methods in this study.

Left, a model of individual gene expression in WT rice growing in the field responding to solar radiation and ambient temperature was built for circadian clock-related genes and found strong effect of temperature. Middle, prediction by the model was used to obtain relationship between physical time of day and expression. Right, by using the relationship, we can infer internal time from expression of multiple genes and found punctuality to 22 min relative to physical time regardless of weather, day-length, or plant developmental age.

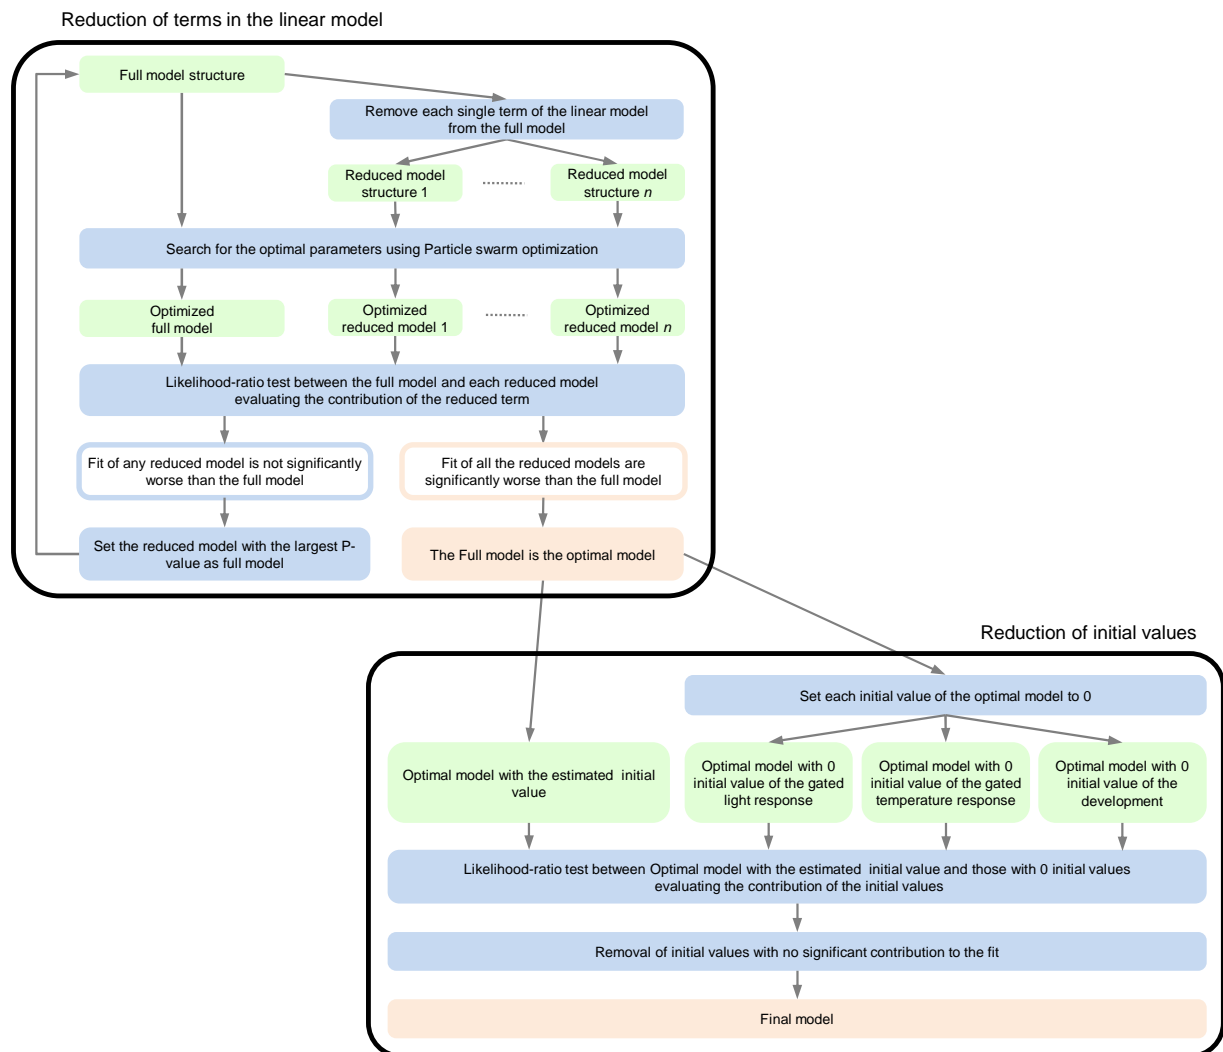

**Supplemental Figure 2. Model improvement by reducing the number of parameters.**

Green, models to be compared; blue, processes and conditions of model improvement; pink, selected models and their conditions. Items shown in outline represent possible outcomes that lead to the next action to take.

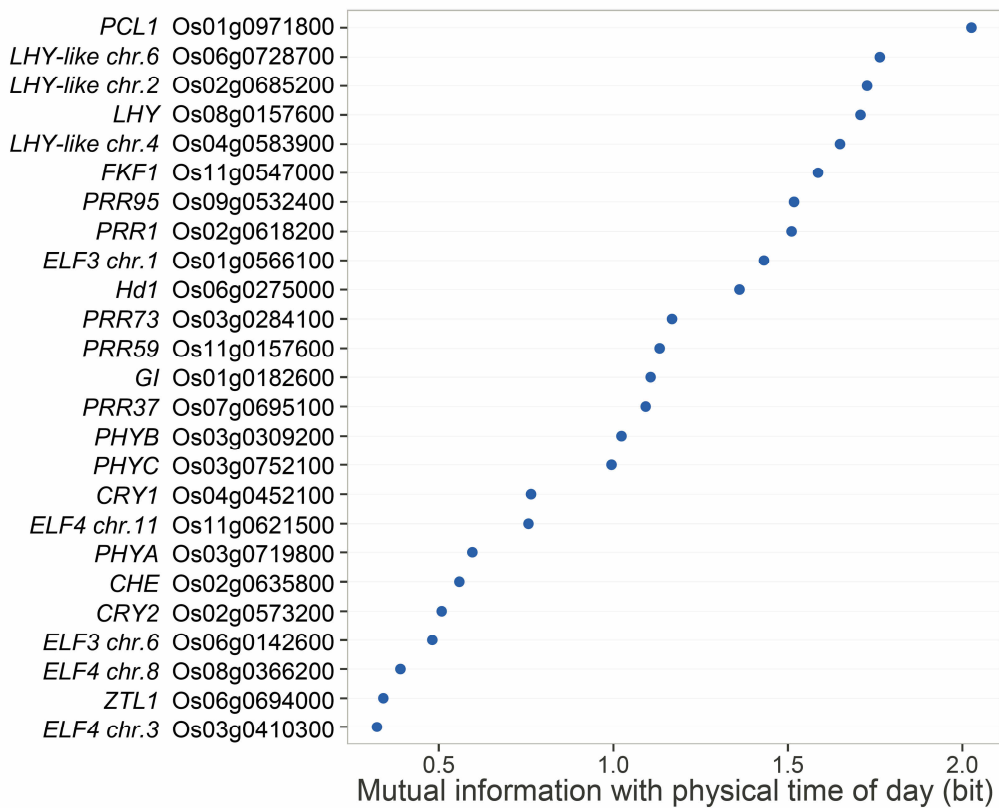

**Supplemental Figure 3. Rhythmicity of gene expression.**

Mutual information between physical (sampling) time of day and estimated expression of the clock-related genes at 10-min intervals during the period when the expression data from training samples was available.

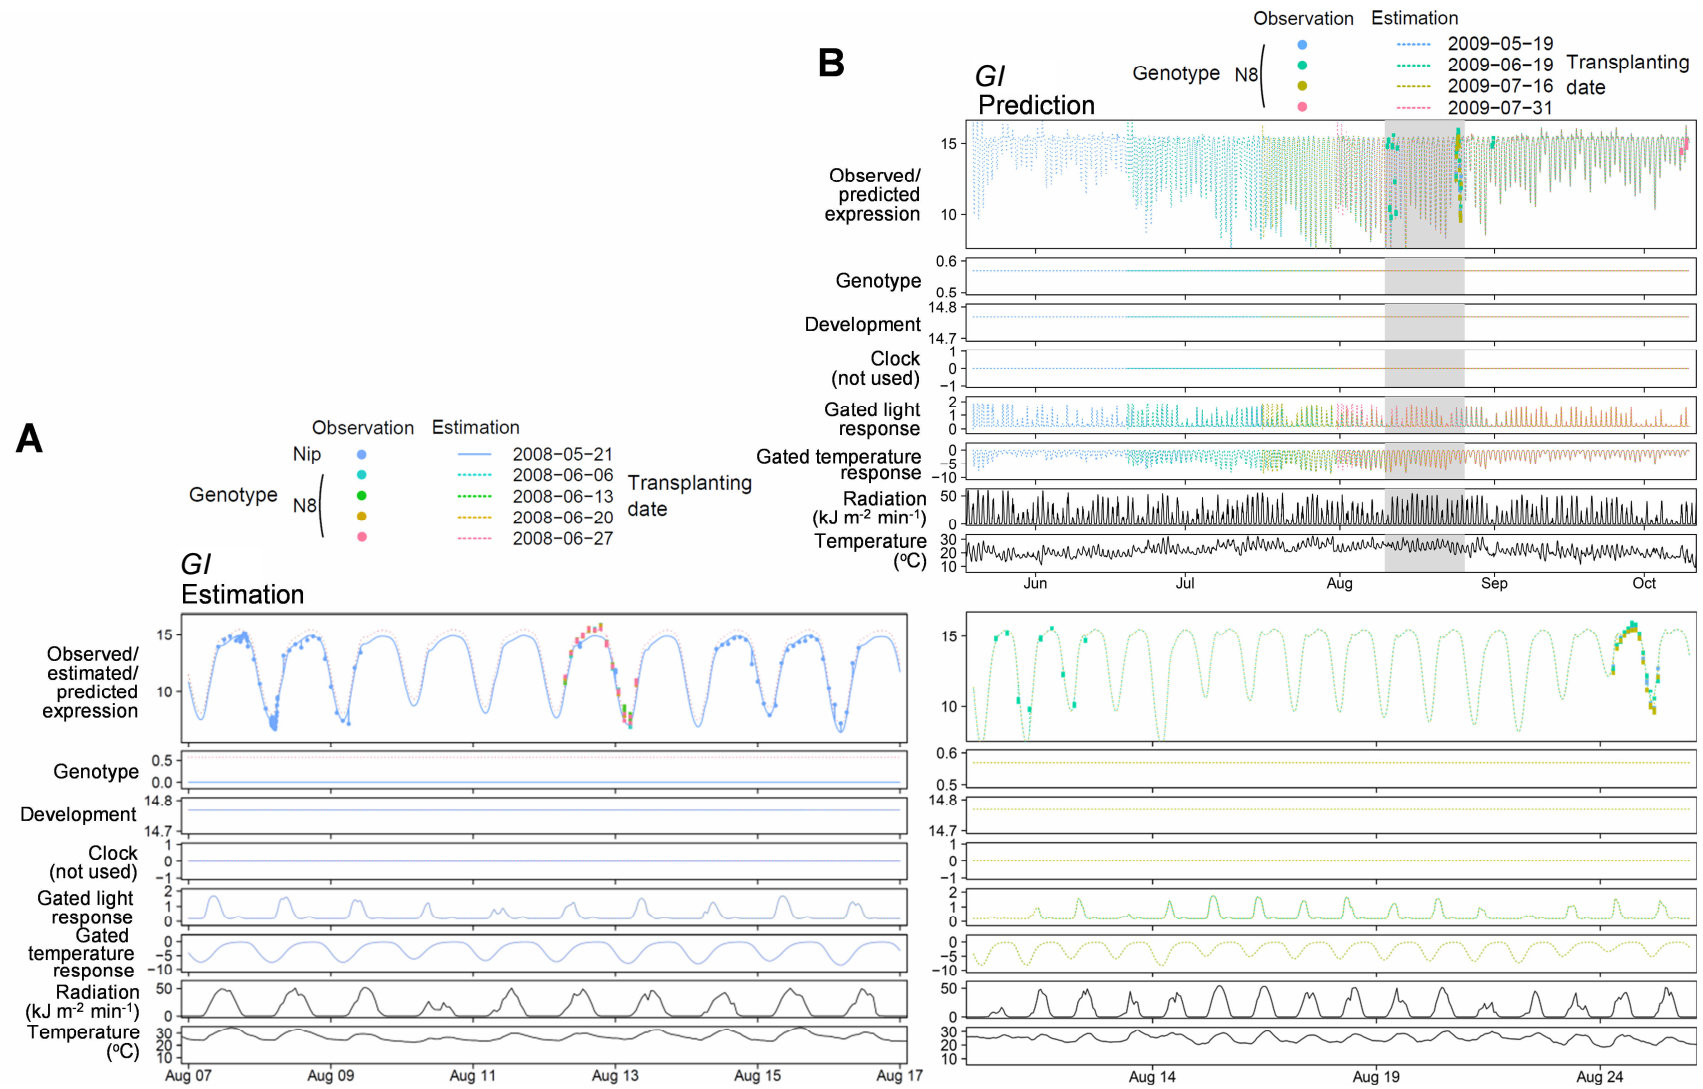

Supplemental Figure 4. A model for *G1*.

**Supplemental Figure 4. A model for *G<sub>i</sub>*.**

**(A)** Estimation using the training data. Here, the time interval shaded in **Figure 1C** is expanded.

**(B)** Prediction using the validation data of solar radiation and ambient temperature, obtained from samples taken in a year other than that for the training data. Time intervals shaded in the upper panel is expanded in the lower panels. Nip, 'Nipponbare'; N8, 'Norin 8'.

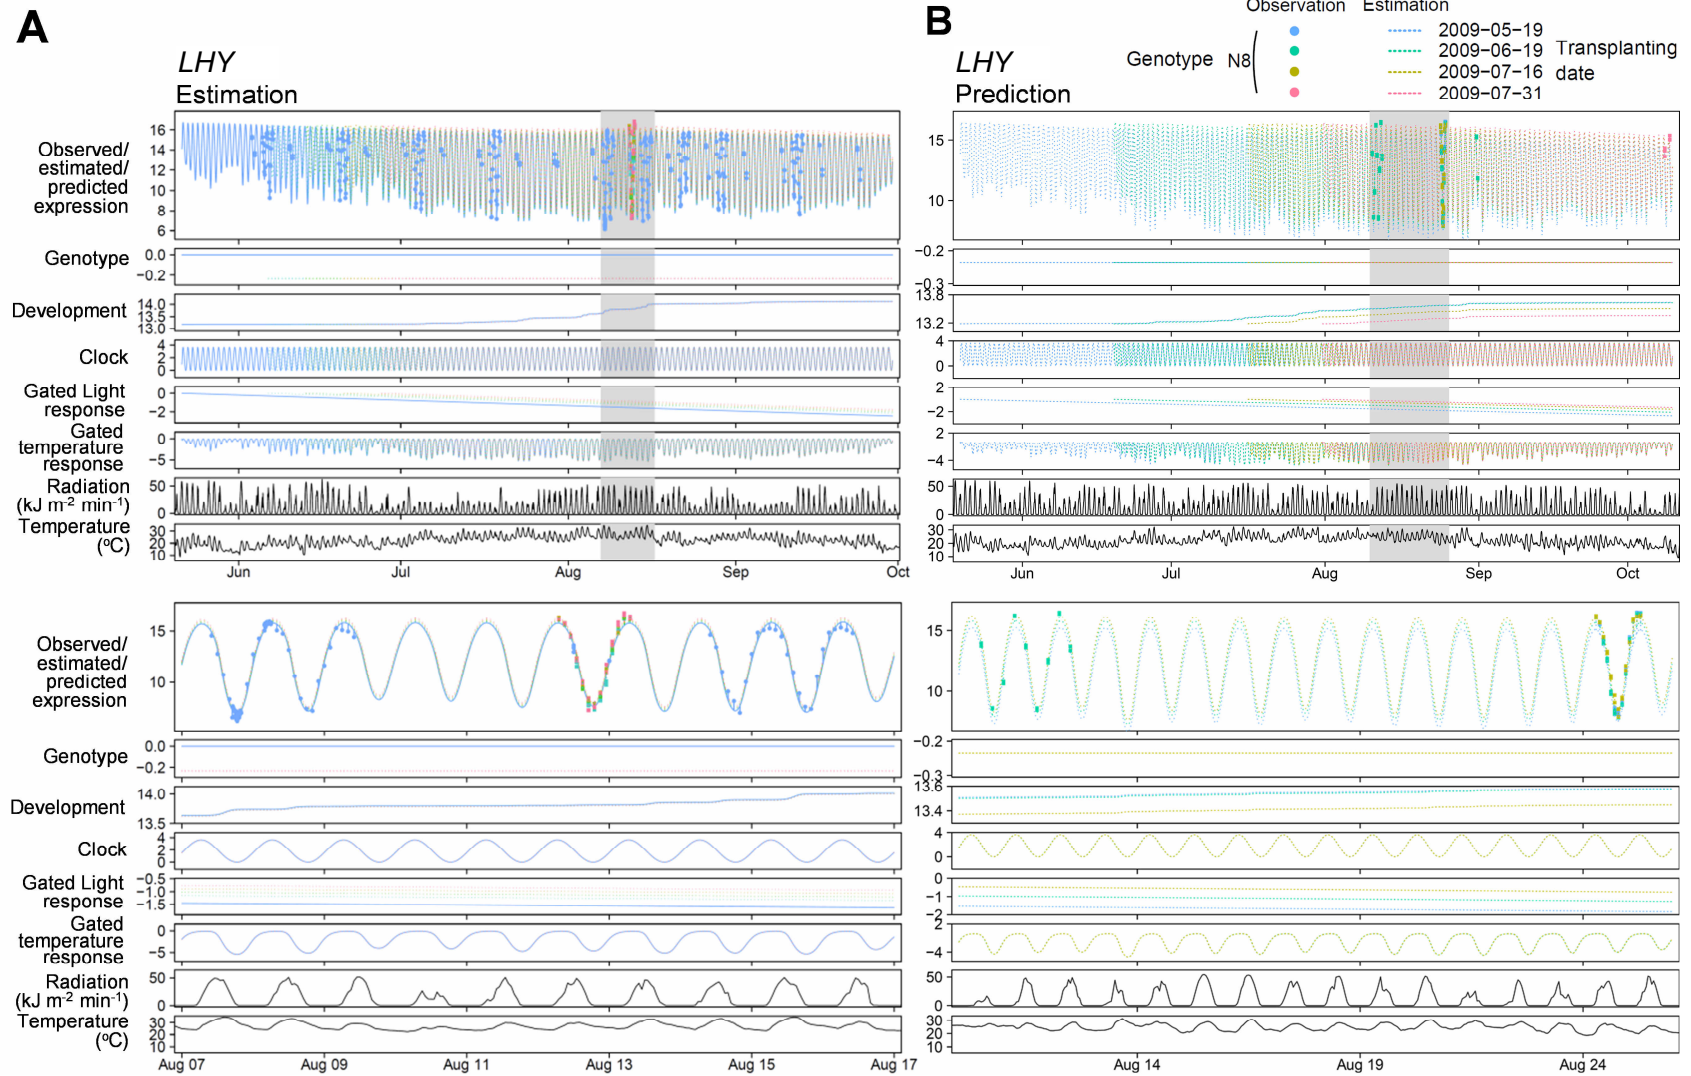

Supplemental Figure 5. A model for *LHY*.

**Supplemental Figure 5. A model for *LHY*.**

**(A)** Estimation using the training data. **(B)** Prediction using the validation data of solar radiation and ambient temperature. Corresponding inputs to the linear model are also shown. Time intervals shaded in the upper panels in **A** and **B** are expanded in the lower panels. Nip, 'Nipponbare'; N8, 'Norin 8'.

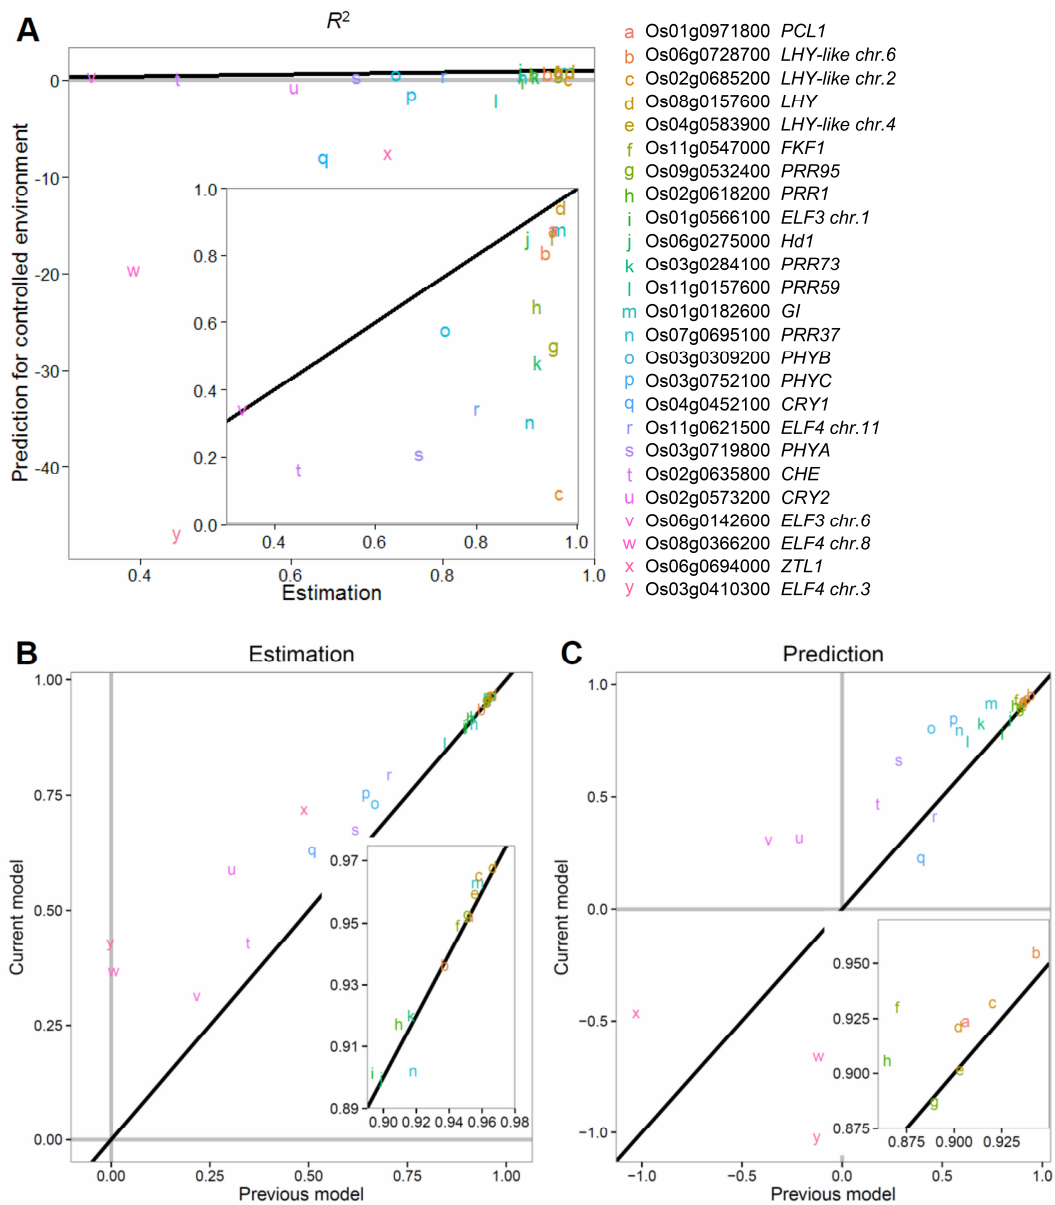

**Supplemental Figure 6. Comparison of model performance with datasets under controlled environment and with previous models.**



**Supplemental Figure 6. Comparison of model performance with datasets under controlled environment and with previous models.**

**(A)** Prediction performance of the models for the clock-related genes for controlled light/dark environment compared with the estimation performance in the field. The estimation performance was for the same training samples ( $n = 461$ ) as horizontal axis of **Figure 1B**.  $R^2$ , the fraction of variance explained by the model relative to variance of the data, was used as an index of fit for each gene model. Genes are listed in the same order as in **Supplemental Figure 3**. **(B)** Comparison of estimation performance ( $R^2$ ) between the previous model (Nagano et al., 2012) and the current model using the training data. **(C)** Comparison of prediction performance between the previous and the current model using the validation data of solar radiation and ambient temperature.

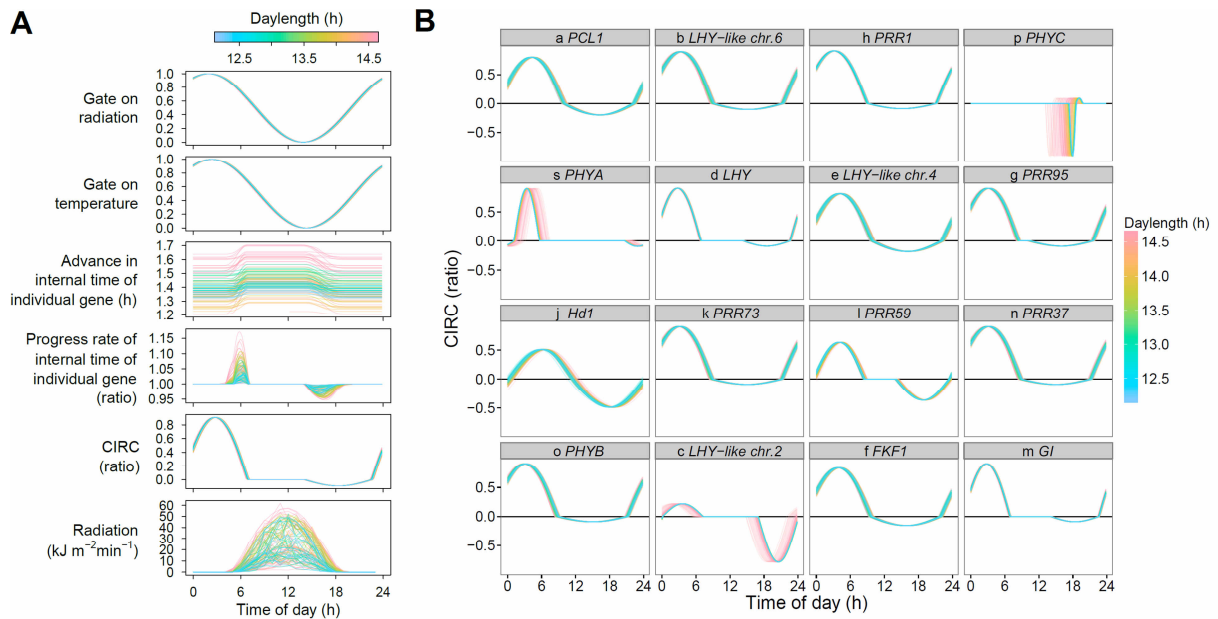

**Supplemental Figure 7. Entrainment of the circadian clock to solar radiation in the field.**

**(A)** Features of entrainment for *Gl*. Each curve corresponds to the time course for each day during sampling period, June to September 2008. Day-length in this figure was the astronomical estimate at the longitude, latitude and altitude where the samples were taken (National Astronomical Observatory of Japan). Gate on radiation and gate on temperature indicate diurnal sensitivity to solar radiation and ambient temperature regulated by the circadian clock in the model, respectively. These corresponds to  $\{1 + g_L C_L(t)\} / 2$  and  $\{1 + g_T C_T(t)\} / 2$  of **Eq. 5** and **6** in Methods, respectively. Advance in internal time of individual gene indicates the difference between internal time of individual gene and physical time of day. Progress rate of internal time of individual gene indicates the change of internal time of individual gene per unit physical time. CIRC, circadian integrated response characteristic (Ronneberg et al., 2010). This is change in progress rate of internal time of individual gene per unit response to solar radiation dependent on the internal time of individual gene, which corresponds to  $S(\varphi)$  of **Eq. 3** and **4** in Methods. **(B)** Estimated CIRC for clock-related genes. Each curve corresponds to the time course showing advances or delays of the internal time of individual gene for each day. Letters preceding gene names correspond to those in **Figure 1B**.

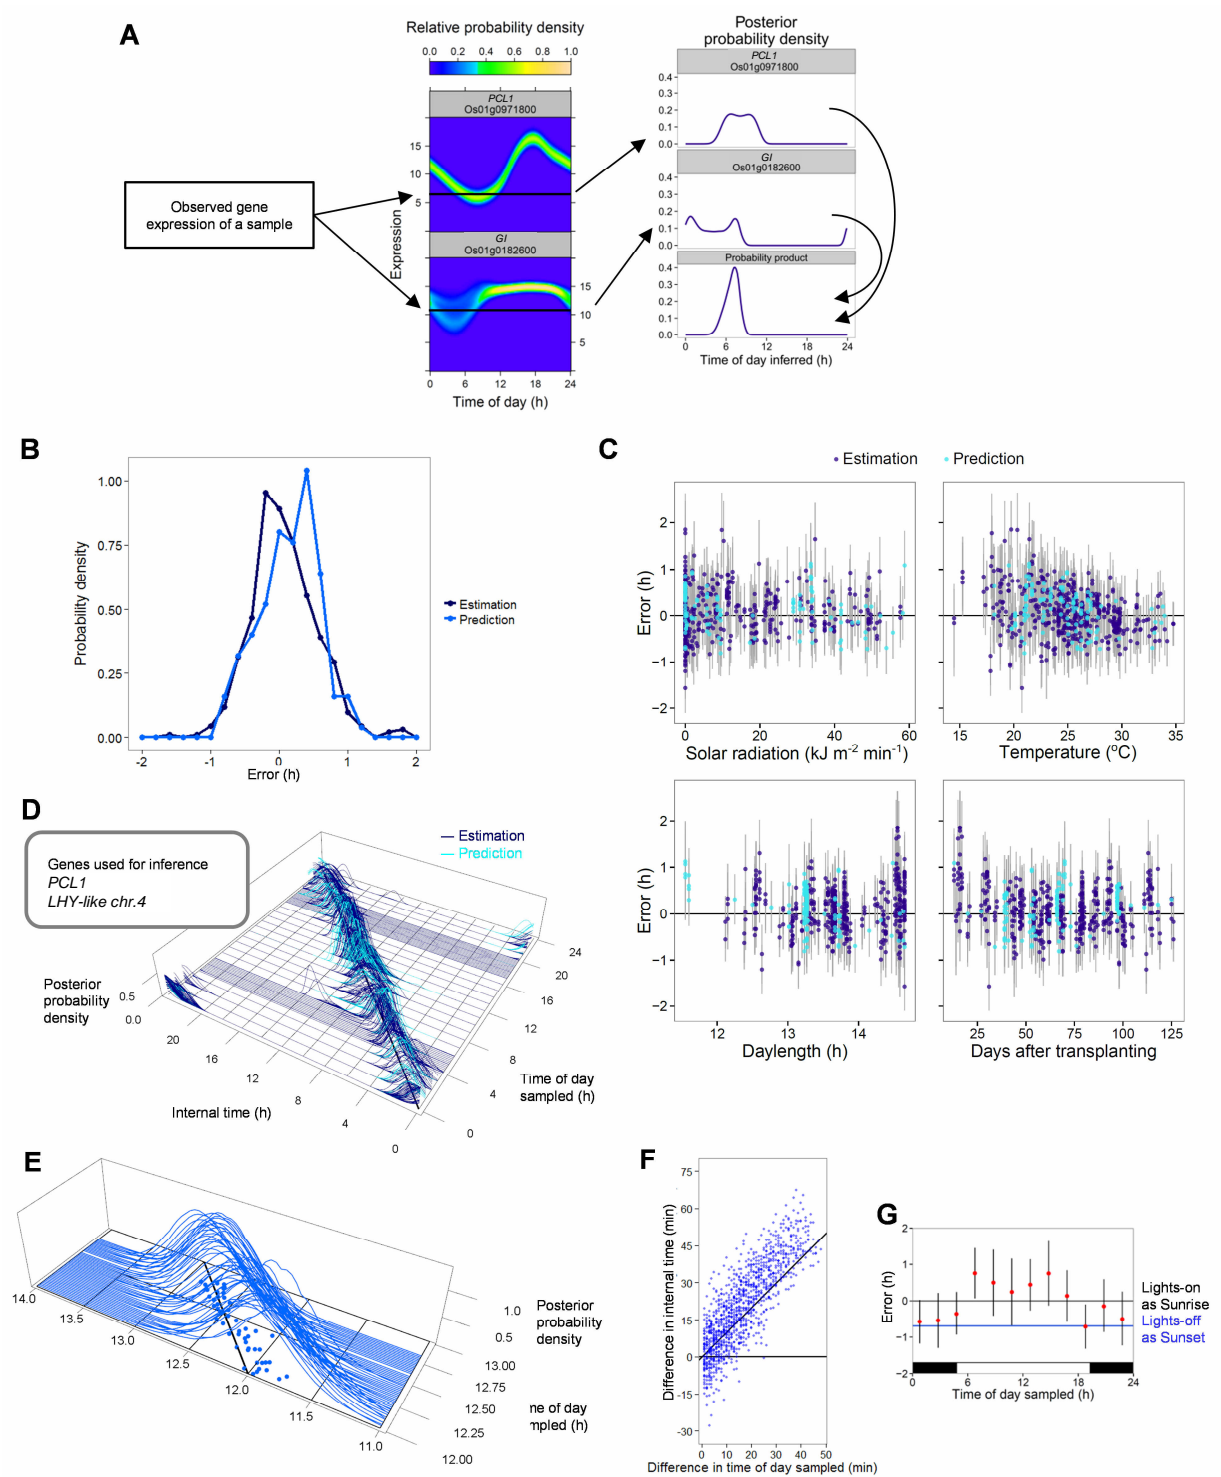

Supplemental Figure 8. Processes and results of Bayesian inference of internal time.

**Supplemental Figure 8. Processes and results of Bayesian inference of internal time.**

**(A)** Scheme for obtaining posterior distribution of time of day from the observed gene expression levels by using probability density distributions of gene expression as a function of physical (sampling) time of day for each gene. **(B)** Distribution of error for the combination of genes with the best estimation performance (**Figure 3C**). The error here is a difference between the expectation of internal time (mean of time of day weighted with posterior probabilities) and time of day sampled. The estimation is for training samples ( $n = 461$ ) and the prediction is for validation samples ( $n = 125$ ). **(C)** Relationships between estimation and prediction error for the combination of genes with the best estimation performance (**Figure 3C**) and solar radiation, ambient temperature, astronomical daylength (National Astronomical Observatory of Japan, [http://eco.mtk.nao.ac.jp/cgi-bin/koyomi/koyomix\\_en.cgi](http://eco.mtk.nao.ac.jp/cgi-bin/koyomi/koyomix_en.cgi)) and days after transplanting when sampled. Points denote expectations and vertical bars denote 90 % credible intervals of posterior distributions for each sample. **(D)** Inference of internal time with the best estimation performance among combinations of two core genes. **(E)** Inference of internal time from 48 validation samples collected at 1-min (or 2-min) intervals. Points indicate expectation, which is the mean of internal time weighted with the posterior probability (indicated by blue curved lines) for each sample. Thick black line indicates coincidence between internal time and time of day sampled. **(F)** Relationship between the difference in time of day sampled and the difference in internal time for all possible pairs of the 48 validation samples. Correct prediction of the sampling order corresponds to the points with positive values for the difference in internal time. **(G)** Prediction error of internal time for samples under a controlled environment. Expectations (red points) and 90% credible intervals (vertical bars) of averaged posterior distributions for respective time of day sampled are shown. Time of day sampled was defined so that lights-on time under the controlled environment corresponded to the average time of sunrise in the field and zero error was shown as the black horizontal line. We also tried to define time of day so that the lights-off time under the controlled environment corresponded to the average time of sunset in the field, and zero error in this case is indicated by the blue horizontal line. White and black bars indicate light and dark periods, respectively. See **Figure 4** for posterior distribution of each sample.

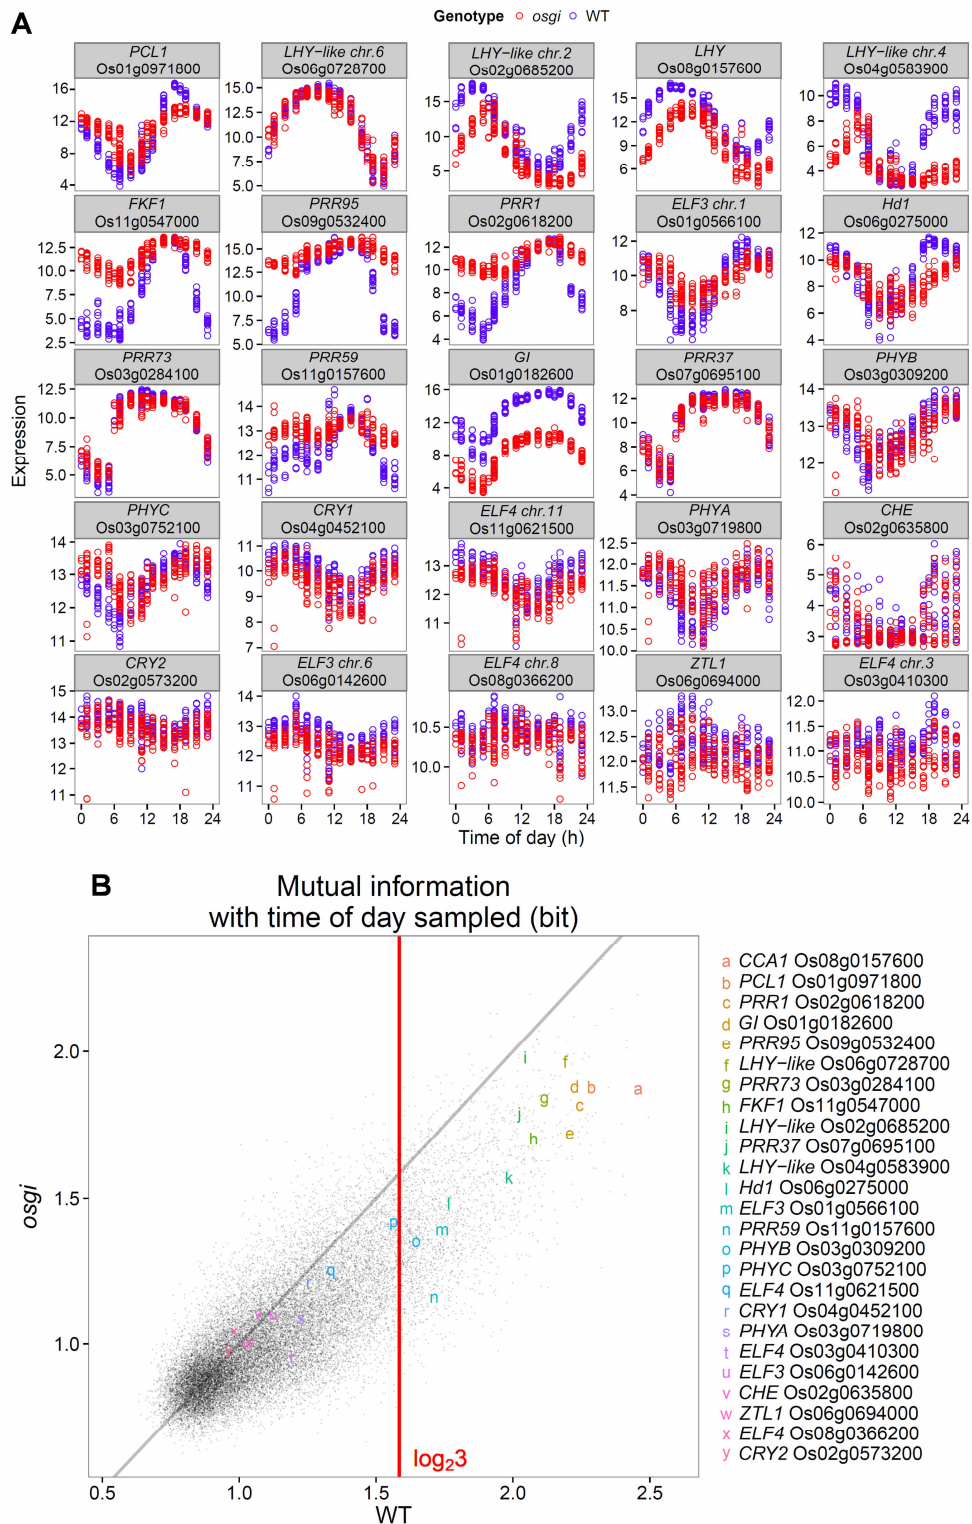

Supplemental Figure 9. Comparison of diurnal gene expression and rhythmicity between the *osgi* mutant and WT.

**Supplemental Figure 9. Comparison of diurnal gene expression and rhythmicity between the *osgi* mutant and WT.**

**(A)** Diurnal expression patterns of 25 clock-related genes in *osgi* and WT (212 pairs of samples with the same timing: 13 time-points in a day, 4 developmental stages, sampling on 12–13/08/2008 and 24–25/08/2009). The genes are listed in order of rhythmicity evaluated as mutual information between the estimated gene expression and time of day (**Supplemental Figure 3**). **(B)** Mutual information between the observed expression of all 23,446 genes on the microarray and physical time of day sampled for *osgi* and WT. The grey line indicates no difference between *osgi* and WT. The genes are listed in order of rhythmicity for WT evaluated as mutual information between the observed gene expression and time of day. By definition of mutual information, we can distinguish a day into three time interval from gene expression with mutual information above  $\log_2 3$ . Therefore we chose genes with  $\geq \log_2 3$  mutual information as the most rhythmic ones (2006 genes; **Figure 6A**).

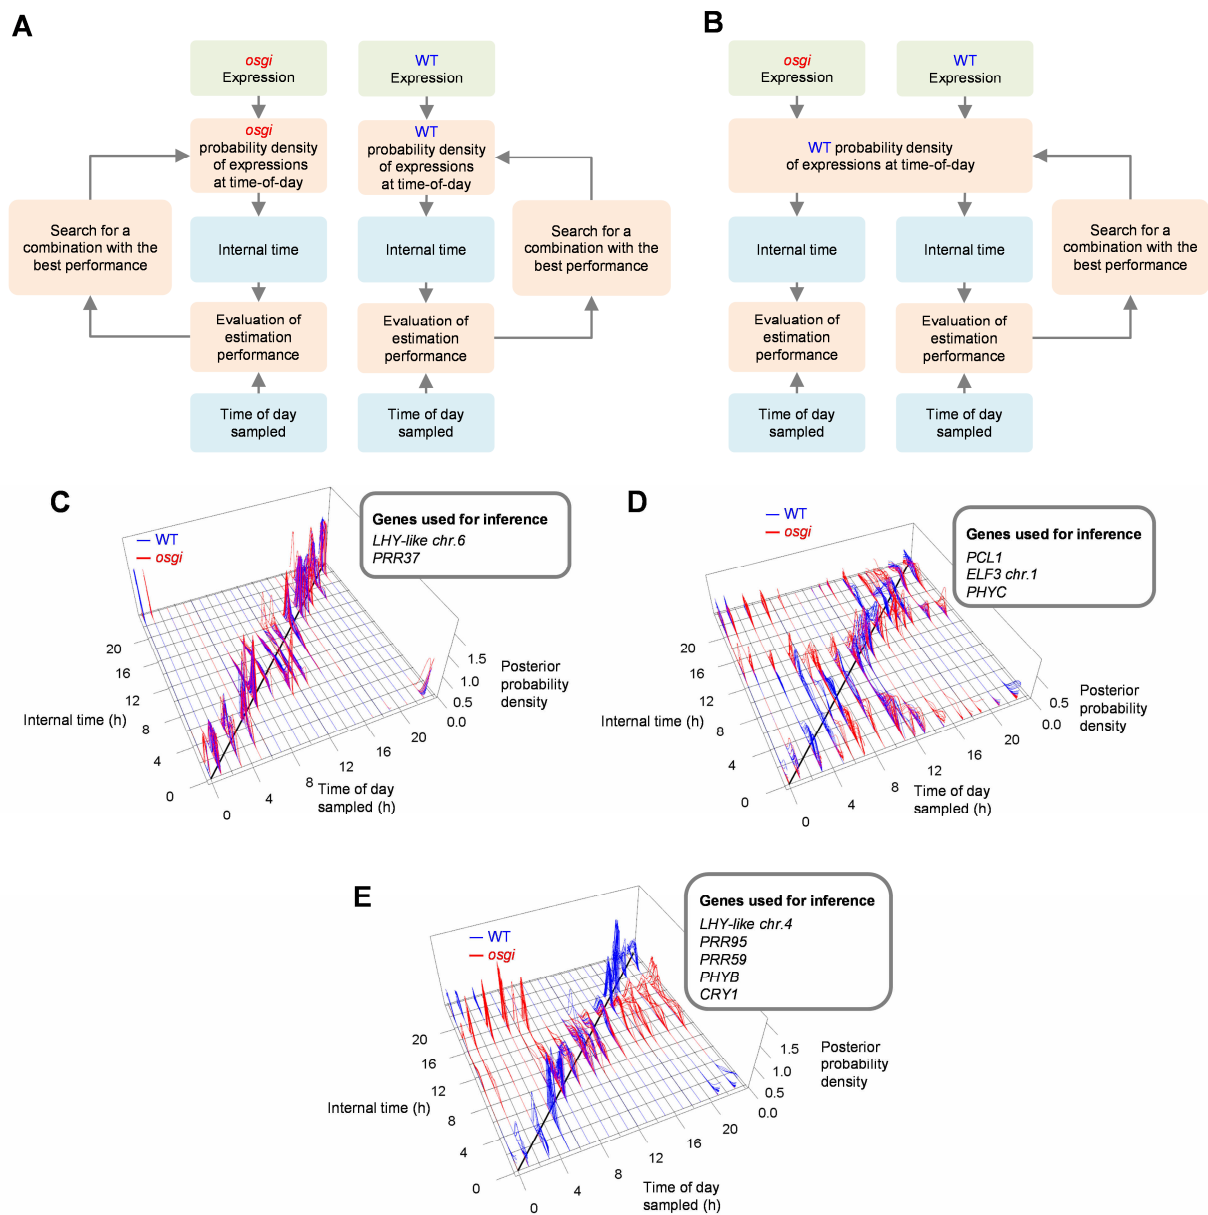

**Supplemental Figure 10. Evaluations of time inference based on gene expression in *osgi* and WT.**

**Supplemental Figure 10. Evaluations of time inference based on gene expression in *osgi* and WT.**

**(A)** A scheme of time inference for **Figure 5A**. Note that calculation of probability densities of gene expression as a function of time of day sampled and optimization of the set of core genes were performed separately for *osgi* and WT. **(B)** A scheme of time inference for **Figure 5B**. Note that calculations of probability density of gene expression as a function of time of day sampled and optimization of the set of core genes were performed only for WT. **(C–E)** Variation of progression of internal time for *osgi* and WT. Progressions of internal time are shown for the gene combination with **(C)** the least mean absolute error for *osgi*, **(D)** the maximum difference in mean absolute error between *osgi* and WT, and **(E)** the maximum difference in standard deviation between *osgi* and WT.



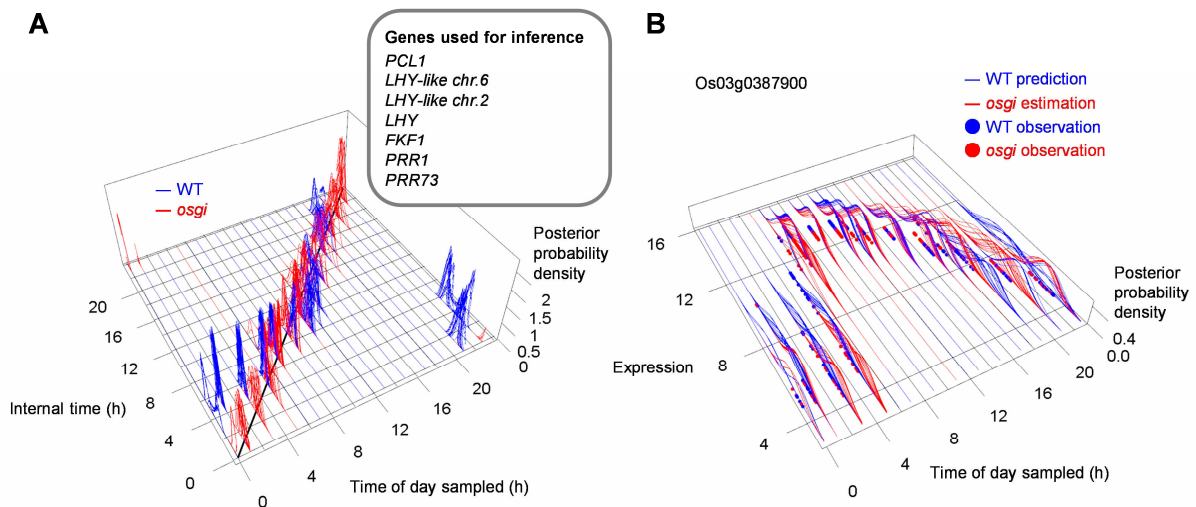

**Supplemental Figure 11. Prediction of WT gene expression of a downstream gene from a combination of core genes that gives the most accurate internal time in *osgi*.**

**(A)** Progression of internal time in WT inferred from the combination of core genes which gives the most accurate internal time relative to physical time in *osgi*. The combination was selected according to the procedure described in *osgi* part of **Supplemental Figure 10A** and its performance was shown in **Figure 5A**. *Os-GI* was excluded from the combination of eight genes shown in **Figure 5A** and the other seven genes indicated were used for the inference. The internal time was inferred based on probability density of expression at time-of-day for *osgi*, in contrast to that for WT in **Figure 6A-C**. **(B)** WT Expression of a downstream gene (*Os03g0387900*) predicted from internal time inferred in **(A)**, based on probability density of *Os03g0387900* expression at time-of-day for *osgi*, in contrast to that for WT in **Figure 6A-C**.

**Supplemental Table 1. Circadian clock-related genes analysed in this study and corresponding Figures.**

| Gene               | OsID         | "Clock-related genes" | "Core genes" | Figure |   |     |   |     |     |   |   |     |   |         |     |
|--------------------|--------------|-----------------------|--------------|--------|---|-----|---|-----|-----|---|---|-----|---|---------|-----|
|                    |              |                       |              | 1      |   | 2   |   | 3   |     |   | 4 | 5   | 6 |         | 7   |
|                    |              |                       |              | B      | C | A,B | A | B,D | C,E | F |   | A,B | A | B,<br>C | A-I |
| <i>PCL1</i>        | Os01g0971800 | X                     | X            | X      | X | X   | X | X   | X   | X | X | X   | X | X       | X   |
| <i>LHY chr.6</i>   | Os06g0728700 | X                     | X            | X      | X | X   | X | X   | X   | X | X | X   | X | X       | X   |
| <i>LHY chr.2</i>   | Os02g0685200 | X                     | X            | X      | X | X   | X | X   | X   | X | X | X   | X | X       | X   |
| <i>LHY</i>         | Os08g0157600 | X                     | X            | X      | X | X   | X | X   | X   | X | X | X   | X | X       | X   |
| <i>LHY chr.4</i>   | Os04g0583900 | X                     | X            | X      | X | X   | X | X   | X   | X | X | X   | X | X       | X   |
| <i>FKF1</i>        | Os11g0547000 | X                     |              | X      | X | X   | X | X   | X   | X | X | X   | X | X       | X   |
| <i>PRR95</i>       | Os09g0532400 | X                     | X            | X      | X | X   | X | X   | X   | X | X | X   | X | X       | X   |
| <i>PRR1</i>        | Os02g0618200 | X                     | X            | X      | X | X   | X | X   | X   | X | X | X   | X | X       | X   |
| <i>ELF3 chr.1</i>  | Os01g0566100 | X                     | X            | X      | X | X   | X | X   | X   | X | X | X   | X | X       | X   |
| <i>Hd1</i>         | Os06g0275000 | X                     |              | X      | X | X   | X | X   | X   | X | X | X   | X | X       | X   |
| <i>PRR73</i>       | Os03g0284100 | X                     | X            | X      | X | X   | X | X   | X   | X | X | X   | X | X       | X   |
| <i>PRR59</i>       | Os11g0157600 | X                     | X            | X      | X | X   | X | X   | X   | X | X | X   | X | X       | X   |
| <i>GI</i>          | Os01g0182600 | X                     | X            | X      | X | X   | X | X   | X   | X | X | X   | X | X       | X   |
| <i>PRR37</i>       | Os07g0695100 | X                     | X            | X      | X | X   | X | X   | X   | X | X | X   | X | X       | X   |
| <i>PHYB</i>        | Os03g0309200 | X                     | X            | X      | X | X   | X | X   | X   | X | X | X   | X | X       | X   |
| <i>PHYC</i>        | Os03g0752100 | X                     | X            | X      | X | X   | X | X   | X   | X | X | X   | X | X       | X   |
| <i>CRY1</i>        | Os04g0452100 | X                     | X            | X      | X | X   | X | X   | X   | X | X | X   | X | X       | X   |
| <i>ELF4 chr.11</i> | Os11g0621500 | X                     |              | X      | X | X   | X | X   | X   | X | X | X   | X | X       | X   |
| <i>PHYA</i>        | Os03g0719800 | X                     |              | X      | X | X   | X | X   | X   | X | X | X   | X | X       | X   |
| <i>CHE</i>         | Os02g0635800 | X                     |              | X      | X | X   | X | X   | X   | X | X | X   | X | X       | X   |
| <i>CRY2</i>        | Os02g0573200 | X                     |              | X      | X | X   | X | X   | X   | X | X | X   | X | X       | X   |
| <i>ELF3 chr.6</i>  | Os06g0142600 | X                     |              | X      | X | X   | X | X   | X   | X | X | X   | X | X       | X   |
| <i>ELF4 chr.8</i>  | Os08g0366200 | X                     |              | X      | X | X   | X | X   | X   | X | X | X   | X | X       | X   |
| <i>ZTL1</i>        | Os06g0694000 | X                     |              | X      | X | X   | X | X   | X   | X | X | X   | X | X       | X   |
| <i>ELF4 chr.3</i>  | Os03g0410300 | X                     |              | X      | X | X   | X | X   | X   | X | X | X   | X | X       | X   |

X, denoted by the term or used in the analysis presented in the indicated figure. The genes are listed in order of rhythmicity evaluated as mutual information between the estimated gene expression and time of day (**Supplemental Fig. 3**).

**Supplemental Table 2. Circadian clock-related genes analysed in this study and corresponding Supplemental Figures.**

| Gene               | OsID         | "Clock-related genes" | "Core genes" | Supplemental Figure |      |     |       |       |           |     |      |       |      |  |
|--------------------|--------------|-----------------------|--------------|---------------------|------|-----|-------|-------|-----------|-----|------|-------|------|--|
|                    |              |                       |              | 4                   | 5    | 6   | 7     | 8     | 9         | 10  | 11   |       |      |  |
|                    |              |                       |              | A, B                | A, B | A   | B, C  | A B A | B, C, E-F | D G | A, B | C D E | A, B |  |
| <i>PCL1</i>        | Os01g0971800 | X                     | X            | X                   |      | X X | X X   | X     | X X X     |     | X    | X     |      |  |
| <i>LHY chr.6</i>   | Os06g0728700 | X                     | X            | X                   |      | X X | X     | X     | X X       | X   |      | X     |      |  |
| <i>LHY chr.2</i>   | Os02g0685200 | X                     | X            | X                   |      | X X | X     | X     | X X       |     |      | X     |      |  |
| <i>LHY</i>         | Os08g0157600 | X                     | X            | X                   | X    | X X | X     | X     | X X       |     |      | X     |      |  |
| <i>LHY chr.4</i>   | Os04g0583900 | X                     | X            | X                   |      | X   | X     | X     | X         |     | X    |       |      |  |
| <i>FKF1</i>        | Os11g0547000 | X                     |              | X                   |      | X X | X     | X     | X X       |     |      | X     |      |  |
| <i>PRR95</i>       | Os09g0532400 | X                     | X            | X                   |      | X X | X     | X     | X X       |     | X    |       |      |  |
| <i>PRR1</i>        | Os02g0618200 | X                     | X            | X                   |      | X X | X     | X     | X X       |     |      | X     |      |  |
| <i>ELF3 chr.1</i>  | Os01g0566100 | X                     | X            | X                   |      | X X |       |       | X         |     | X    |       |      |  |
| <i>Hd1</i>         | Os06g0275000 | X                     |              | X                   |      | X X | X     | X     | X X       |     |      |       |      |  |
| <i>PRR73</i>       | Os03g0284100 | X                     | X            | X                   |      | X X | X     | X     | X X       |     |      | X     |      |  |
| <i>PRR59</i>       | Os11g0157600 | X                     | X            | X                   |      | X X | X     |       | X         |     | X    |       |      |  |
| <i>GI</i>          | Os01g0182600 | X                     | X            | X X                 |      | X X | X X X | X     | X X       |     |      |       |      |  |
| <i>PRR37</i>       | Os07g0695100 | X                     | X            | X                   |      | X X | X     | X     | X X       | X   |      |       |      |  |
| <i>PHYB</i>        | Os03g0309200 | X                     | X            | X                   |      | X X | X     | X     | X X       |     |      | X     |      |  |
| <i>PHYC</i>        | Os03g0752100 | X                     | X            | X                   |      | X X | X     | X     | X X       |     | X    |       |      |  |
| <i>CRY1</i>        | Os04g0452100 | X                     | X            | X                   |      | X X |       |       | X         |     | X    |       |      |  |
| <i>ELF4 chr.11</i> | Os11g0621500 | X                     |              | X                   |      | X X |       | X     | X X       |     |      |       |      |  |
| <i>PHYA</i>        | Os03g0719800 | X                     |              | X                   |      | X X | X     | X     | X X       |     |      |       |      |  |
| <i>CHE</i>         | Os02g0635800 | X                     |              | X                   |      | X X |       |       | X         |     |      |       |      |  |
| <i>CRY2</i>        | Os02g0573200 | X                     |              | X                   |      | X X |       |       | X         |     |      |       |      |  |
| <i>ELF3 chr.6</i>  | Os06g0142600 | X                     |              | X                   |      | X X |       |       | X         |     |      |       |      |  |
| <i>ELF4 chr.8</i>  | Os08g0366200 | X                     |              | X                   |      | X X |       |       | X         |     |      |       |      |  |
| <i>ZTL1</i>        | Os06g0694000 | X                     |              | X                   |      | X X |       |       | X         |     |      |       |      |  |
| <i>ELF4 chr.3</i>  | Os03g0410300 | X                     |              | X                   |      | X X |       |       | X         |     |      |       |      |  |

X, denoted by the term or used in the analysis presented in the indicated figure. The genes are listed in order of rhythmicity evaluated as mutual information between the estimated gene expression and time of day (**Supplemental Fig. 3**).

**Supplemental Table 3. Circadian clock-related genes analysed in this study and corresponding Supplemental Tables and Data Set.**

| Gene               | OsID         | "Clock-related genes" | "Core genes" | Supplemental Table |   |   |    |    |    | Supplemental Data Set |   |
|--------------------|--------------|-----------------------|--------------|--------------------|---|---|----|----|----|-----------------------|---|
|                    |              |                       |              | 7                  | 8 | 9 | 10 | 11 | 12 | 1                     |   |
| <i>PCL1</i>        | Os01g0971800 | X                     | X            | X                  | X | X | X  | X  | X  | X                     | X |
| <i>LHY chr.6</i>   | Os06g0728700 | X                     | X            | X                  | X | X | X  | X  | X  | X                     | X |
| <i>LHY chr.2</i>   | Os02g0685200 | X                     | X            | X                  | X | X | X  | X  | X  | X                     | X |
| <i>LHY</i>         | Os08g0157600 | X                     | X            | X                  | X | X | X  | X  | X  | X                     | X |
| <i>LHY chr.4</i>   | Os04g0583900 | X                     | X            | X                  | X | X | X  | X  | X  | X                     | X |
| <i>FKF1</i>        | Os11g0547000 | X                     |              | X                  |   | X | X  | X  | X  | X                     | X |
| <i>PRR95</i>       | Os09g0532400 | X                     | X            | X                  | X | X | X  | X  | X  | X                     | X |
| <i>PRR1</i>        | Os02g0618200 | X                     | X            | X                  | X | X | X  | X  | X  | X                     | X |
| <i>ELF3 chr.1</i>  | Os01g0566100 | X                     | X            | X                  | X | X | X  | X  | X  | X                     | X |
| <i>Hd1</i>         | Os06g0275000 | X                     |              | X                  |   | X | X  | X  | X  | X                     | X |
| <i>PRR73</i>       | Os03g0284100 | X                     | X            | X                  | X | X | X  | X  | X  | X                     | X |
| <i>PRR59</i>       | Os11g0157600 | X                     | X            | X                  | X | X | X  | X  | X  | X                     | X |
| <i>GI</i>          | Os01g0182600 | X                     | X            | X                  | X | X | X  | X  | X  | X                     | X |
| <i>PRR37</i>       | Os07g0695100 | X                     | X            | X                  | X | X | X  | X  | X  | X                     | X |
| <i>PHYB</i>        | Os03g0309200 | X                     | X            | X                  | X | X | X  | X  | X  | X                     | X |
| <i>PHYC</i>        | Os03g0752100 | X                     | X            | X                  | X | X | X  | X  | X  | X                     | X |
| <i>CRY1</i>        | Os04g0452100 | X                     | X            | X                  | X | X | X  | X  | X  | X                     | X |
| <i>ELF4 chr.11</i> | Os11g0621500 | X                     |              | X                  | X | X | X  | X  | X  | X                     | X |
| <i>PHYA</i>        | Os03g0719800 | X                     |              | X                  | X | X | X  | X  | X  | X                     | X |
| <i>CHE</i>         | Os02g0635800 | X                     |              | X                  |   | X | X  | X  | X  | X                     | X |
| <i>CRY2</i>        | Os02g0573200 | X                     |              | X                  |   | X | X  | X  | X  |                       |   |
| <i>ELF3 chr.6</i>  | Os06g0142600 | X                     |              | X                  |   | X | X  | X  | X  |                       |   |
| <i>ELF4 chr.8</i>  | Os08g0366200 | X                     |              | X                  |   | X | X  | X  | X  |                       |   |
| <i>ZTL1</i>        | Os06g0694000 | X                     |              | X                  |   | X | X  | X  | X  |                       |   |
| <i>ELF4 chr.3</i>  | Os03g0410300 | X                     |              | X                  |   | X | X  | X  | X  |                       |   |

X, denoted by the term or used in the analysis presented in the indicated table. The genes are listed in order of rhythmicity evaluated as mutual information between the estimated gene expression and time of day (**Supplemental Figure 3**).

**Supplemental Table 4. Transcriptome dataset analysed in this study and corresponding Figures.**

| GEO ID                   | Reference                                | Year | Vari-ety | Geno-type   | n   | Figure  |     |       |     |   |   |   |     |     |   |
|--------------------------|------------------------------------------|------|----------|-------------|-----|---------|-----|-------|-----|---|---|---|-----|-----|---|
|                          |                                          |      |          |             |     | 1       | 2   | 3     |     |   | 4 | 5 |     | 6   | 7 |
|                          |                                          |      |          |             |     | B,<br>C | A,B | A,B,F | C,D | E | A | B | A-C | A-I |   |
| GSE21397                 | Sato et al. (2011), Nagano et al. (2012) | 2008 | Nip      | WT          | 51  | T       | T   | T     | T   | T | T |   |     |     |   |
| GSE36040                 | Nagano et al. (2012)                     | 2008 | Nip      | WT          | 225 | T       | T   | T     | T   | T | T |   |     |     |   |
| GSE36042                 | Nagano et al. (2012)                     | 2008 | Nip      | WT          | 34  | T       | T   | T     | T   | T | T |   |     |     |   |
| GSE36043                 | Nagano et al. (2012)                     | 2008 | Nip      | WT          | 28  | T       | T   | T     | T   | T | T |   |     |     |   |
| GSE36044                 | Nagano et al. (2012)                     | 2008 | Nip      | WT          | 19  | T       | T   | T     | T   | T | T |   |     |     |   |
| GSE18685 (WT)            | Izawa et al. (2011)                      | 2008 | N8       | WT          | 104 | T       | T   | T     | T   | T | T | T | T   | T   | T |
| GSE36777 (WT)            | Nagano et al. (2012)                     | 2009 | N8       | WT          | 108 | V       |     |       | V   |   |   | T | T   | T   | T |
| GSE39520                 | Nagano et al. (2012)                     | 2010 | Nip      | WT          | 17  |         |     |       | V   |   |   |   |     |     |   |
| GSE52120                 | This study                               | 2008 | Nip      | WT          | 48  |         |     |       |     | V |   |   |     |     |   |
| GSE54525                 | This study                               | 2013 | Kos      | WT          | 26  |         |     |       |     |   | V |   |     |     |   |
| GSE18685 ( <i>osgi</i> ) | Izawa et al. (2011)                      | 2008 | N8       | <i>osgi</i> | 104 |         |     |       |     |   |   | T | V   | V   | V |
| GSE36777 ( <i>osgi</i> ) | This study                               | 2009 | N8       | <i>osgi</i> | 108 |         |     |       |     |   |   | T | V   | V   | V |

T, used as training data for model fitting and estimation. V, used as validation data for prediction using the model fitted to the training data. Nip, Nipponbare; N8, Norin 8; Kos, Koshihikari.

**Supplemental Table 5. Transcriptome dataset analysed in this study and corresponding Supplemental Figures.**

| GEO ID                   | Reference                                | Year | Variety | Geno-type   | n   | Supplemental Figure |      |   |   |   |      |   |     |      |   |      |     |      |    |
|--------------------------|------------------------------------------|------|---------|-------------|-----|---------------------|------|---|---|---|------|---|-----|------|---|------|-----|------|----|
|                          |                                          |      |         |             |     | 3                   | 4, 5 |   | 6 |   |      | 7 |     | 8    |   |      | 9   | 10   | 11 |
|                          |                                          |      |         |             |     |                     | A, B | A | B | C | A, B | A | B-D | E, F | G | A, B | C-E | A, B |    |
| GSE21397                 | Sato et al. (2011), Nagano et al. (2012) | 2008 | Nip     | WT          | 51  | T                   | T    | T | T | T | T    | T | T   | T    |   |      |     |      |    |
| GSE36040                 | Nagano et al. (2012)                     | 2008 | Nip     | WT          | 225 | T                   | T    | T | T | T | T    | T | T   | T    |   |      |     |      |    |
| GSE36042                 | Nagano et al. (2012)                     | 2008 | Nip     | WT          | 34  | T                   | T    | T | T | T | T    | T | T   | T    |   |      |     |      |    |
| GSE36043                 | Nagano et al. (2012)                     | 2008 | Nip     | WT          | 28  | T                   | T    | T | T | T | T    | T | T   | T    |   |      |     |      |    |
| GSE36044                 | Nagano et al. (2012)                     | 2008 | Nip     | WT          | 19  | T                   | T    | T | T | T | T    | T | T   | T    |   |      |     |      |    |
| GSE18685 (WT)            | Izawa et al. (2011)                      | 2008 | N8      | WT          | 104 | T                   | T    | T | T | T | T    | T | T   | T    | R | T    | V   |      |    |
| GSE36777 (WT)            | Nagano et al. (2012)                     | 2009 | N8      | WT          | 108 |                     | V    |   | V |   | V    |   |     |      | R | T    | V   |      |    |
| GSE39520                 | Nagano et al. (2012)                     | 2010 | Nip     | WT          | 17  |                     |      |   | V |   | V    |   |     |      |   |      |     |      |    |
| GSE52120                 | This study                               | 2008 | Nip     | WT          | 48  |                     |      |   |   |   |      |   | V   |      |   |      |     |      |    |
| GSE54525                 | This study                               | 2013 | Kos     | WT          | 26  |                     |      | V |   |   |      |   |     | V    |   |      |     |      |    |
| GSE18685 ( <i>osgi</i> ) | Izawa et al. (2011)                      | 2008 | N8      | <i>osgi</i> | 104 |                     |      |   |   |   |      |   |     |      | R | V    | T   |      |    |
| GSE36777 ( <i>osgi</i> ) | This study                               | 2009 | N8      | <i>osgi</i> | 108 |                     |      |   |   |   |      |   |     |      | R | V    | T   |      |    |

T, used as training data for model fitting and estimation. V, used as validation data for prediction using the model fitted to the training data. R, raw data are plotted without modeling. Nip, Nipponbare; N8, Norin 8; Kos, Koshihikari.

**Supplemental Table 6. Transcriptome dataset analysed in this study and corresponding Supplemental Tables and Data Set.**

| GEO ID                   | Reference                                   | Year | Vari-ety | Geno-type   | <i>n</i> | Supplemental Table |   |   |    |    |    | Supplemental Data Set |
|--------------------------|---------------------------------------------|------|----------|-------------|----------|--------------------|---|---|----|----|----|-----------------------|
|                          |                                             |      |          |             |          | 7                  | 8 | 9 | 10 | 11 | 12 | 1                     |
| GSE21397                 | Sato et al. (2011),<br>Nagano et al. (2012) | 2008 | Nip      | WT          | 51       | T                  |   | T | T  | T  | T  | T                     |
| GSE36040                 | Nagano et al. (2012)                        | 2008 | Nip      | WT          | 225      | T                  |   | T | T  | T  | T  | T                     |
| GSE36042                 | Nagano et al. (2012)                        | 2008 | Nip      | WT          | 34       | T                  |   | T | T  | T  | T  | T                     |
| GSE36043                 | Nagano et al. (2012)                        | 2008 | Nip      | WT          | 28       | T                  |   | T | T  | T  | T  | T                     |
| GSE36044                 | Nagano et al. (2012)                        | 2008 | Nip      | WT          | 19       | T                  |   | T | T  | T  | T  | T                     |
| GSE18685 (WT)            | Izawa et al. (2011)                         | 2008 | N8       | WT          | 104      | T                  | T | T | T  | T  | T  | T                     |
| GSE36777 (WT)            | Nagano et al. (2012)                        | 2009 | N8       | WT          | 108      |                    | T |   |    |    |    | V                     |
| GSE39520                 | Nagano et al. (2012)                        | 2010 | Nip      | WT          | 17       |                    |   |   |    |    |    | V                     |
| GSE52120                 | This study                                  | 2008 | Nip      | WT          | 48       |                    |   |   |    |    |    |                       |
| GSE54525                 | This study                                  | 2013 | Kos      | WT          | 26       |                    |   |   |    |    |    |                       |
| GSE18685 ( <i>osgi</i> ) | Izawa et al. (2011)                         | 2008 | N8       | <i>osgi</i> | 104      |                    | V |   |    |    |    |                       |
| GSE36777 ( <i>osgi</i> ) | This study                                  | 2009 | N8       | <i>osgi</i> | 108      |                    | V |   |    |    |    |                       |

T, used as training data for model fitting and estimation. V, used as validation data for prediction using the model fitted to the training data. Nip, Nipponbare; N8, Norin 8; Kos, Koshihikari.

**Supplemental Table 7. Contributions of the genes to the time inference.**

| Gene               | OsID         | Median difference in L-criterion (h) | W-statistic of Wilcoxon signed-rank test | P-value (random permutation test with Bonferroni-correction, log <sub>10</sub> scale) | Mean of W-statistic for null distribution | Standard deviation of W-statistic for null distribution | P-value of Kolmogorov-Smirnov test for normality |
|--------------------|--------------|--------------------------------------|------------------------------------------|---------------------------------------------------------------------------------------|-------------------------------------------|---------------------------------------------------------|--------------------------------------------------|
| <i>PRR73</i>       | Os03g0284100 | -0.056                               | -1.437E+11                               | -2121.6                                                                               | -1.419E+11                                | 1.814E+07                                               | 0.813                                            |
| <i>PRR37</i>       | Os07g0695100 | -0.065                               | -1.437E+11                               | -2036.8                                                                               | -1.420E+11                                | 1.751E+07                                               | 0.841                                            |
| <i>LHY chr.2</i>   | Os02g0685200 | -0.214                               | -1.437E+11                               | -1973.2                                                                               | -1.422E+11                                | 1.640E+07                                               | 0.311                                            |
| <i>GI</i>          | Os01g0182600 | -0.106                               | -1.437E+11                               | -1958.4                                                                               | -1.422E+11                                | 1.636E+07                                               | 0.702                                            |
| <i>PHYB</i>        | Os03g0309200 | -0.062                               | -1.437E+11                               | -1920.7                                                                               | -1.421E+11                                | 1.722E+07                                               | 0.866                                            |
| <i>Hd1</i>         | Os06g0275000 | -0.106                               | -1.437E+11                               | -1879.5                                                                               | -1.422E+11                                | 1.640E+07                                               | 0.810                                            |
| <i>PRR95</i>       | Os09g0532400 | -0.097                               | -1.437E+11                               | -1871.0                                                                               | -1.421E+11                                | 1.732E+07                                               | 0.893                                            |
| <i>FKF1</i>        | Os11g0547000 | -0.155                               | -1.437E+11                               | -1686.1                                                                               | -1.424E+11                                | 1.441E+07                                               | 0.863                                            |
| <i>LHY chr.4</i>   | Os04g0583900 | -0.174                               | -1.437E+11                               | -1655.3                                                                               | -1.423E+11                                | 1.588E+07                                               | 0.750                                            |
| <i>PCL1</i>        | Os01g0971800 | -0.256                               | -1.437E+11                               | -1528.0                                                                               | -1.426E+11                                | 1.327E+07                                               | 0.106                                            |
| <i>LHY chr.6</i>   | Os06g0728700 | -0.202                               | -1.437E+11                               | -1507.8                                                                               | -1.426E+11                                | 1.335E+07                                               | 0.748                                            |
| <i>LHY</i>         | Os08g0157600 | -0.257                               | -1.437E+11                               | -1480.0                                                                               | -1.426E+11                                | 1.315E+07                                               | 0.884                                            |
| <i>PHYC</i>        | Os03g0752100 | -0.046                               | -1.435E+11                               | -1388.7                                                                               | -1.421E+11                                | 1.699E+07                                               | 0.825                                            |
| <i>ELF3 chr.1</i>  | Os01g0566100 | -0.104                               | -1.435E+11                               | -1326.1                                                                               | -1.422E+11                                | 1.649E+07                                               | 0.972                                            |
| <i>PRR1</i>        | Os02g0618200 | -0.084                               | -1.435E+11                               | -1294.9                                                                               | -1.422E+11                                | 1.651E+07                                               | 0.783                                            |
| <i>PRR59</i>       | Os11g0157600 | -0.058                               | -1.427E+11                               | -278.5                                                                                | -1.421E+11                                | 1.712E+07                                               | 0.941                                            |
| <i>ELF4 chr.11</i> | Os11g0621500 | -0.025                               | -1.409E+11                               | 1.4                                                                                   | -1.422E+11                                | 1.631E+07                                               | 0.060                                            |
| <i>CRY1</i>        | Os04g0452100 | -0.021                               | -1.416E+11                               | 1.4                                                                                   | -1.420E+11                                | 1.763E+07                                               | 0.832                                            |
| <i>CHE</i>         | Os02g0635800 | -0.010                               | -1.314E+11                               | 1.4                                                                                   | -1.419E+11                                | 1.856E+07                                               | 0.817                                            |
| <i>PHYA</i>        | Os03g0719800 | -0.009                               | -1.331E+11                               | 1.4                                                                                   | -1.419E+11                                | 1.835E+07                                               | 0.974                                            |
| <i>CRY2</i>        | Os02g0573200 | -0.008                               | -1.299E+11                               | 1.4                                                                                   | -1.420E+11                                | 1.831E+07                                               | 0.294                                            |
| <i>ELF4 chr.8</i>  | Os08g0366200 | -0.008                               | -1.382E+11                               | 1.4                                                                                   | -1.420E+11                                | 1.799E+07                                               | 0.667                                            |
| <i>ELF3 chr.6</i>  | Os06g0142600 | -0.005                               | -1.144E+11                               | 1.4                                                                                   | -1.418E+11                                | 1.871E+07                                               | 0.596                                            |
| <i>ELF4 chr.3</i>  | Os03g0410300 | -0.003                               | -1.417E+11                               | 1.4                                                                                   | -1.419E+11                                | 1.802E+07                                               | 0.764                                            |
| <i>ZTL1</i>        | Os06g0694000 | -0.003                               | -1.249E+11                               | 1.4                                                                                   | -1.418E+11                                | 1.888E+07                                               | 0.383                                            |



**Supplemental Table 8. Downstream genes found, their prediction performance and principal component scores.**

| OsID         | Minimum scaled L-criterion | Bonferroni-corrected P-value of the L-criterion (random permutation test, log <sub>10</sub> scale) | Mean of L-criterion for null distribution | Standard deviation of L-criterion for null distribution | P-value of Kolmogorov-Smirnov test for normality | PC1 score based on P-value of Wilcoxon's signed-rank test (Figure 7B) | PC2 score based on P-value of Wilcoxon's signed-rank test (Figure 7B) |
|--------------|----------------------------|----------------------------------------------------------------------------------------------------|-------------------------------------------|---------------------------------------------------------|--------------------------------------------------|-----------------------------------------------------------------------|-----------------------------------------------------------------------|
| Os08g0468100 | 0.424                      | -34.5                                                                                              | 3.048                                     | 0.122                                                   | 0.931                                            | -2.488                                                                | -0.198                                                                |
| Os06g0701600 | 0.491                      | -44.0                                                                                              | 3.443                                     | 0.134                                                   | 0.950                                            | -2.366                                                                | -0.282                                                                |
| Os01g0226600 | 0.452                      | -45.6                                                                                              | 2.529                                     | 0.103                                                   | 0.382                                            | -2.283                                                                | -0.788                                                                |
| Os02g0704300 | 0.438                      | -38.3                                                                                              | 2.633                                     | 0.107                                                   | 0.887                                            | -2.133                                                                | -1.731                                                                |
| Os07g0659300 | 0.445                      | -41.6                                                                                              | 2.723                                     | 0.098                                                   | 0.766                                            | -2.077                                                                | -1.052                                                                |
| Os03g0228200 | 0.331                      | -34.9                                                                                              | 4.932                                     | 0.204                                                   | 0.755                                            | -2.035                                                                | -0.181                                                                |
| Os01g0949500 | 0.436                      | -39.9                                                                                              | 1.771                                     | 0.070                                                   | 0.784                                            | -1.998                                                                | -0.838                                                                |
| Os06g0662200 | 0.488                      | -41.8                                                                                              | 2.090                                     | 0.078                                                   | 0.870                                            | -1.922                                                                | 0.052                                                                 |
| Os02g0116500 | 0.472                      | -44.9                                                                                              | 0.885                                     | 0.033                                                   | 0.893                                            | -1.796                                                                | 1.110                                                                 |
| Os07g0425000 | 0.492                      | -40.6                                                                                              | 2.894                                     | 0.112                                                   | 0.938                                            | -1.777                                                                | 1.028                                                                 |
| Os02g0594700 | 0.399                      | -40.5                                                                                              | 2.186                                     | 0.082                                                   | 0.650                                            | -1.698                                                                | -1.076                                                                |
| Os07g0637300 | 0.424                      | -48.4                                                                                              | 2.725                                     | 0.108                                                   | 0.776                                            | -1.682                                                                | -0.342                                                                |
| Os02g0137700 | 0.355                      | -31.8                                                                                              | 4.305                                     | 0.188                                                   | 0.808                                            | -1.681                                                                | -0.806                                                                |
| Os01g0346700 | 0.429                      | -38.7                                                                                              | 1.421                                     | 0.058                                                   | 0.807                                            | -1.656                                                                | -0.860                                                                |
| Os07g0630800 | 0.407                      | -40.8                                                                                              | 2.561                                     | 0.104                                                   | 0.919                                            | -1.626                                                                | -0.451                                                                |
| Os01g0826900 | 0.477                      | -50.0                                                                                              | 1.923                                     | 0.072                                                   | 0.345                                            | -1.582                                                                | -0.962                                                                |
| Os01g0823600 | 0.441                      | -41.3                                                                                              | 3.760                                     | 0.140                                                   | 0.326                                            | -1.529                                                                | -0.891                                                                |
| Os03g0387900 | 0.249                      | -44.4                                                                                              | 3.166                                     | 0.108                                                   | 0.859                                            | -1.464                                                                | -1.988                                                                |
| Os03g0197000 | 0.427                      | -49.8                                                                                              | 2.027                                     | 0.077                                                   | 0.855                                            | -1.398                                                                | 1.587                                                                 |
| Os02g0816600 | 0.481                      | -47.2                                                                                              | 2.352                                     | 0.088                                                   | 0.741                                            | -1.388                                                                | -0.444                                                                |
| Os03g0625300 | 0.390                      | -36.5                                                                                              | 2.496                                     | 0.102                                                   | 0.494                                            | -1.384                                                                | -2.170                                                                |
| Os08g0557200 | 0.406                      | -37.9                                                                                              | 3.005                                     | 0.124                                                   | 0.969                                            | -1.279                                                                | -0.947                                                                |
| Os08g0157600 | 0.465                      | -50.4                                                                                              | 3.449                                     | 0.120                                                   | 0.975                                            | -1.189                                                                | 1.902                                                                 |
| Os01g0825500 | 0.412                      | -40.9                                                                                              | 1.886                                     | 0.075                                                   | 0.921                                            | -1.149                                                                | -1.504                                                                |
| Os09g0511600 | 0.492                      | -42.8                                                                                              | 1.560                                     | 0.059                                                   | 0.847                                            | -1.136                                                                | 1.939                                                                 |
| Os03g0290300 | 0.473                      | -45.8                                                                                              | 2.499                                     | 0.093                                                   | 0.795                                            | -1.109                                                                | 0.068                                                                 |
| Os04g0578400 | 0.386                      | -37.5                                                                                              | 3.296                                     | 0.130                                                   | 0.520                                            | -1.056                                                                | 0.450                                                                 |
| Os05g0582300 | 0.438                      | -40.5                                                                                              | 2.168                                     | 0.083                                                   | 0.934                                            | -0.997                                                                | -0.543                                                                |
| Os01g0281100 | 0.353                      | -40.4                                                                                              | 3.715                                     | 0.145                                                   | 0.912                                            | -0.941                                                                | -0.357                                                                |
| Os08g0178800 | 0.499                      | -45.7                                                                                              | 2.507                                     | 0.095                                                   | 0.364                                            | -0.891                                                                | -1.195                                                                |
| Os05g0170950 | 0.384                      | -44.5                                                                                              | 2.944                                     | 0.114                                                   | 0.443                                            | -0.814                                                                | 0.138                                                                 |
| Os02g0498300 | 0.451                      | -41.8                                                                                              | 1.868                                     | 0.073                                                   | 0.554                                            | -0.793                                                                | 1.428                                                                 |
| Os07g0448800 | 0.495                      | -51.1                                                                                              | 1.540                                     | 0.057                                                   | 0.790                                            | -0.785                                                                | 0.102                                                                 |
| Os01g0954000 | 0.479                      | -46.8                                                                                              | 2.928                                     | 0.099                                                   | 0.755                                            | -0.685                                                                | 2.369                                                                 |

**Supplemental Table 8. (Continued).**

| OsID         | Minimum scaled L-criterion | Bonferroni-corrected P-value of the L-criterion (random permutation test, log <sub>10</sub> scale) | Mean of L-criterion for null distribution | Standard deviation of L-criterion for null distribution | P-value of Kolmogorov-Smirnov test for normality | PC1 score based on P-value of Wilcoxon's signed-rank test (Figure 7B) | PC2 score based on P-value of Wilcoxon's signed-rank test (Figure 7B) |
|--------------|----------------------------|----------------------------------------------------------------------------------------------------|-------------------------------------------|---------------------------------------------------------|--------------------------------------------------|-----------------------------------------------------------------------|-----------------------------------------------------------------------|
| Os05g0510100 | 0.482                      | -47.2                                                                                              | 1.102                                     | 0.040                                                   | 0.955                                            | -0.675                                                                | 1.485                                                                 |
| Os03g0230500 | 0.499                      | -45.8                                                                                              | 1.348                                     | 0.050                                                   | 0.669                                            | -0.641                                                                | 1.288                                                                 |
| Os05g0534400 | 0.485                      | -46.7                                                                                              | 2.032                                     | 0.075                                                   | 0.962                                            | -0.591                                                                | 1.211                                                                 |
| Os01g0846800 | 0.351                      | -34.1                                                                                              | 4.273                                     | 0.173                                                   | 0.959                                            | -0.541                                                                | 0.171                                                                 |
| Os10g0510500 | 0.490                      | -40.1                                                                                              | 2.699                                     | 0.112                                                   | 0.835                                            | -0.535                                                                | -2.696                                                                |
| Os12g0577600 | 0.407                      | -46.2                                                                                              | 2.335                                     | 0.083                                                   | 0.455                                            | -0.458                                                                | 2.614                                                                 |
| Os01g0804400 | 0.484                      | -44.1                                                                                              | 2.458                                     | 0.092                                                   | 0.952                                            | -0.384                                                                | -0.278                                                                |
| Os05g0586600 | 0.390                      | -40.8                                                                                              | 3.186                                     | 0.129                                                   | 0.669                                            | -0.338                                                                | -0.154                                                                |
| Os03g0176700 | 0.490                      | -50.6                                                                                              | 2.198                                     | 0.078                                                   | 0.720                                            | -0.191                                                                | 0.860                                                                 |
| Os12g0132800 | 0.468                      | -49.8                                                                                              | 2.294                                     | 0.085                                                   | 0.579                                            | -0.021                                                                | 1.715                                                                 |
| Os01g0266800 | 0.436                      | -44.5                                                                                              | 2.914                                     | 0.109                                                   | 0.832                                            | 0.024                                                                 | 1.525                                                                 |
| Os04g0578200 | 0.409                      | -40.9                                                                                              | 2.194                                     | 0.082                                                   | 0.997                                            | 0.398                                                                 | 2.085                                                                 |
| Os06g0133100 | 0.478                      | -42.1                                                                                              | 3.044                                     | 0.126                                                   | 0.675                                            | 0.453                                                                 | -2.807                                                                |
| Os05g0561600 | 0.424                      | -45.8                                                                                              | 1.897                                     | 0.073                                                   | 0.924                                            | 0.510                                                                 | 1.146                                                                 |
| Os01g0767600 | 0.407                      | -33.8                                                                                              | 2.099                                     | 0.092                                                   | 0.654                                            | 0.611                                                                 | -2.509                                                                |
| Os06g0712300 | 0.489                      | -56.7                                                                                              | 1.172                                     | 0.041                                                   | 0.880                                            | 0.673                                                                 | 1.856                                                                 |
| Os03g0807900 | 0.467                      | -56.5                                                                                              | 1.394                                     | 0.047                                                   | 0.431                                            | 0.724                                                                 | 0.950                                                                 |
| Os01g0700100 | 0.409                      | -41.1                                                                                              | 4.129                                     | 0.159                                                   | 0.791                                            | 0.927                                                                 | 1.327                                                                 |
| Os06g0554200 | 0.400                      | -33.1                                                                                              | 4.055                                     | 0.169                                                   | 0.834                                            | 1.119                                                                 | -3.147                                                                |
| Os07g0617700 | 0.483                      | -52.8                                                                                              | 2.888                                     | 0.101                                                   | 0.510                                            | 1.243                                                                 | 1.814                                                                 |
| Os03g0592500 | 0.432                      | -39.9                                                                                              | 3.407                                     | 0.143                                                   | 0.847                                            | 1.248                                                                 | -2.875                                                                |
| Os09g0553800 | 0.461                      | -50.7                                                                                              | 1.268                                     | 0.048                                                   | 0.194                                            | 1.926                                                                 | 2.617                                                                 |
| Os01g0817000 | 0.474                      | -52.2                                                                                              | 1.263                                     | 0.044                                                   | 0.961                                            | 2.293                                                                 | 2.499                                                                 |
| Os05g0365600 | 0.495                      | -55.0                                                                                              | 1.776                                     | 0.062                                                   | 0.561                                            | 2.544                                                                 | 2.347                                                                 |
| Os09g0346500 | 0.431                      | -33.0                                                                                              | 3.863                                     | 0.171                                                   | 0.593                                            | 2.575                                                                 | -3.330                                                                |
| Os08g0249000 | 0.492                      | -44.2                                                                                              | 3.303                                     | 0.132                                                   | 0.872                                            | 2.978                                                                 | -6.563                                                                |
| Os02g0643000 | 0.470                      | -49.9                                                                                              | 1.340                                     | 0.049                                                   | 0.993                                            | 3.036                                                                 | 1.456                                                                 |
| Os01g0228400 | 0.419                      | -41.0                                                                                              | 2.082                                     | 0.075                                                   | 0.931                                            | 3.167                                                                 | 2.292                                                                 |
| Os02g0827400 | 0.488                      | -51.0                                                                                              | 3.641                                     | 0.129                                                   | 0.976                                            | 3.597                                                                 | 2.047                                                                 |
| Os12g0512100 | 0.496                      | -44.5                                                                                              | 3.135                                     | 0.113                                                   | 0.660                                            | 3.715                                                                 | 2.300                                                                 |
| Os04g0679900 | 0.492                      | -44.3                                                                                              | 1.413                                     | 0.052                                                   | 0.930                                            | 4.067                                                                 | 2.514                                                                 |
| Os03g0703300 | 0.478                      | -44.1                                                                                              | 1.586                                     | 0.059                                                   | 0.722                                            | 4.885                                                                 | 0.347                                                                 |
| Os04g0448900 | 0.437                      | -40.5                                                                                              | 2.363                                     | 0.094                                                   | 0.897                                            | 5.326                                                                 | -4.395                                                                |
| Os10g0330400 | 0.496                      | -46.5                                                                                              | 2.806                                     | 0.104                                                   | 0.959                                            | 7.125                                                                 | -2.278                                                                |

PC, principal component. NA, not available.

**Supplemental Table 9. Coefficients for the terms in the linear model.**

| Gene               | OsID         | Clock ( $\beta_C$ ) | Gated light response ( $\beta_L$ ) | Gated temperature response ( $\beta_T$ ) | Development ( $\beta_D$ ) | Genotype ( $\beta_G$ ) |
|--------------------|--------------|---------------------|------------------------------------|------------------------------------------|---------------------------|------------------------|
| <i>PCL1</i>        | Os01g0971800 | -7.30E+00           | 1.75E-04                           | -7.61E-02                                | NA                        | -3.16E-01              |
| <i>LHY chr.6</i>   | Os06g0728700 | 5.26E+00            | 6.04E-03                           | 8.38E-02                                 | -8.28E-08                 | -3.91E-01              |
| <i>LHY chr.2</i>   | Os02g0685200 | NA                  | 2.46E-02                           | -5.49E-03                                | 1.95E-05                  | -4.39E-01              |
| <i>LHY</i>         | Os08g0157600 | 3.64E+00            | -4.39E-07                          | -9.22E-04                                | 2.88E-05                  | -2.35E-01              |
| <i>LHY chr.4</i>   | Os04g0583900 | -2.06E+00           | NA                                 | -5.85E-02                                | 1.98E-04                  | -2.17E-01              |
| <i>FKF1</i>        | Os11g0547000 | NA                  | 8.61E-03                           | -4.83E-03                                | NA                        | 2.50E-01               |
| <i>PRR95</i>       | Os09g0532400 | 1.52E+00            | 1.72E-02                           | 8.93E-02                                 | 4.51E-06                  | -2.73E-01              |
| <i>PRR1</i>        | Os02g0618200 | 7.85E+00            | 2.29E-03                           | -1.97E-03                                | 8.76E-08                  | -6.26E-01              |
| <i>ELF3 chr.1</i>  | Os01g0566100 | -7.98E+00           | 2.57E-05                           | -9.31E-04                                | -2.34E-05                 | 5.95E-01               |
| <i>Hd1</i>         | Os06g0275000 | -2.32E+00           | NA                                 | -3.34E-03                                | 1.03E-05                  | NA                     |
| <i>PRR73</i>       | Os03g0284100 | 3.42E+00            | 2.01E-01                           | -1.31E-03                                | -8.99E-07                 | 4.00E-01               |
| <i>PRR59</i>       | Os11g0157600 | 2.18E+00            | 1.29E+06                           | -2.55E-03                                | 1.33E-05                  | NA                     |
| <i>GI</i>          | Os01g0182600 | NA                  | 5.29E-03                           | -1.42E-03                                | 1.44E-05                  | 5.69E-01               |
| <i>PRR37</i>       | Os07g0695100 | 1.74E+00            | 2.50E-01                           | -9.47E-03                                | -1.43E-06                 | 3.42E-01               |
| <i>PHYB</i>        | Os03g0309200 | -1.17E+00           | 7.05E-05                           | -1.33E-02                                | NA                        | NA                     |
| <i>PHYC</i>        | Os03g0752100 | -1.21E+00           | -1.95E-02                          | 2.47E-04                                 | 1.35E-05                  | NA                     |
| <i>CRY1</i>        | Os04g0452100 | -5.94E-01           | -5.70E-04                          | -3.12E+00                                | 1.12E-05                  | NA                     |
| <i>ELF4 chr.11</i> | Os11g0621500 | -4.69E-01           | -1.26E+06                          | 4.59E-04                                 | 5.14E-08                  | 3.82E-01               |
| <i>PHYA</i>        | Os03g0719800 | -5.62E-01           | -2.98E-02                          | 1.77E-03                                 | 1.27E-07                  | -2.08E-01              |
| <i>CHE</i>         | Os02g0635800 | NA                  | -1.30E-03                          | 1.01E-01                                 | -1.42E-07                 | NA                     |
| <i>CRY2</i>        | Os02g0573200 | 7.23E-01            | 4.32E-05                           | -9.45E-03                                | 1.25E-07                  | 2.82E-01               |
| <i>ELF3 chr.6</i>  | Os06g0142600 | 6.73E-01            | 1.26E-05                           | 8.84E-04                                 | NA                        | NA                     |
| <i>ELF4 chr.8</i>  | Os08g0366200 | -2.56E-01           | 5.46E-03                           | -2.55E-04                                | 2.40E-05                  | NA                     |
| <i>ZTL1</i>        | Os06g0694000 | 2.64E-01            | 1.08E-02                           | -1.19E-03                                | 1.47E-07                  | NA                     |
| <i>ELF4 chr.3</i>  | Os03g0410300 | 7.09E-01            | -1.25E-03                          | -3.22E-02                                | 1.01E-04                  | NA                     |

In parenthesis is symbols in the model description. NA, not available. The term is excluded in the final model.

**Supplemental Table 10. Parameters for the development and clock terms.**

| Gene               | OsID         | Development                                   |                               |                                                                 | Clock                                      |                                                      |                              |                                     |
|--------------------|--------------|-----------------------------------------------|-------------------------------|-----------------------------------------------------------------|--------------------------------------------|------------------------------------------------------|------------------------------|-------------------------------------|
|                    |              | Initial value<br>( $D_1$ ,<br>[0, $2^{20}$ ]) | Gain<br>( $a_D$ ,<br>[0, 30]) | Intercept<br>( $b_D$ , range of<br>the relative<br>temperature) | Response<br>window<br>( $w$ ,<br>[0.1, 1]) | Asymmetry<br>in<br>response<br>( $q$ ,<br>[0.1, 10]) | Gain<br>( $a_C$ ,<br>[0, 8]) | Phase<br>( $p_C$ ,<br>[0, $2\pi$ ]) |
| <i>PCL1</i>        | Os01g0971800 | NA                                            | NA                            | NA                                                              | 1.00                                       | 4.01                                                 | 4.91                         | 1.03                                |
| <i>LHY chr.6</i>   | Os06g0728700 | NA                                            | 29.46                         | 0.02                                                            | 1.00                                       | 8.54                                                 | 8.00                         | 1.44                                |
| <i>LHY chr.2</i>   | Os02g0685200 | 1.02E+06                                      | 29.83                         | 1.00                                                            | 0.59                                       | 0.28                                                 | 2.46                         | NA                                  |
| <i>LHY</i>         | Os08g0157600 | 4.58E+05                                      | 30.00                         | 0.74                                                            | 0.69                                       | 9.99                                                 | 8.00                         | 0.50                                |
| <i>LHY chr.4</i>   | Os04g0583900 | 4.96E+04                                      | 29.99                         | 0.84                                                            | 1.00                                       | 4.44                                                 | 4.97                         | 2.83                                |
| <i>FKF1</i>        | Os11g0547000 | NA                                            | NA                            | NA                                                              | 1.00                                       | 5.36                                                 | 5.03                         | NA                                  |
| <i>PRR95</i>       | Os09g0532400 | 1.05E+06                                      | 6.61                          | 1.00                                                            | 0.92                                       | 9.91                                                 | 8.00                         | 3.14                                |
| <i>PRR1</i>        | Os02g0618200 | NA                                            | 18.53                         | 0.00                                                            | 1.00                                       | 10.00                                                | 3.35                         | 2.61                                |
| <i>ELF3 chr.1</i>  | Os01g0566100 | NA                                            | 0.08                          | 0.25                                                            | 1.00                                       | 5.75                                                 | 5.10                         | 0.62                                |
| <i>Hd1</i>         | Os06g0275000 | 1.05E+06                                      | 9.80                          | 1.00                                                            | 1.00                                       | 1.05                                                 | 7.33                         | 0.40                                |
| <i>PRR73</i>       | Os03g0284100 | NA                                            | 30.00                         | 0.58                                                            | 1.00                                       | 10.00                                                | 7.53                         | 2.99                                |
| <i>PRR59</i>       | Os11g0157600 | 1.05E+06                                      | 16.34                         | 1.00                                                            | 0.77                                       | 1.75                                                 | 8.00                         | 0.00                                |
| <i>GI</i>          | Os01g0182600 | 1.03E+06                                      | 29.95                         | 1.00                                                            | 0.70                                       | 10.00                                                | 8.00                         | NA                                  |
| <i>PRR37</i>       | Os07g0695100 | NA                                            | 29.99                         | 0.63                                                            | 1.00                                       | 10.00                                                | 8.00                         | 3.14                                |
| <i>PHYB</i>        | Os03g0309200 | NA                                            | NA                            | NA                                                              | 1.00                                       | 9.99                                                 | 8.00                         | 0.53                                |
| <i>PHYC</i>        | Os03g0752100 | 1.05E+06                                      | 12.44                         | 1.00                                                            | 0.10                                       | 0.10                                                 | 1.42                         | 1.71                                |
| <i>CRY1</i>        | Os04g0452100 | 1.01E+06                                      | 30.00                         | 1.00                                                            | 0.47                                       | 0.72                                                 | 2.96                         | 3.06                                |
| <i>ELF4 chr.11</i> | Os11g0621500 | 9.45E+05                                      | 29.40                         | 0.15                                                            | 0.99                                       | 9.55                                                 | 4.53                         | 2.40                                |
| <i>PHYA</i>        | Os03g0719800 | NA                                            | 30.00                         | 0.42                                                            | 0.37                                       | 9.39                                                 | 3.75                         | 0.09                                |
| <i>CHE</i>         | Os02g0635800 | NA                                            | 0.00                          | 0.78                                                            | 1.00                                       | 8.13                                                 | 8.00                         | NA                                  |
| <i>CRY2</i>        | Os02g0573200 | NA                                            | 29.96                         | 0.37                                                            | 0.46                                       | 1.31                                                 | 6.93                         | 0.30                                |
| <i>ELF3 chr.6</i>  | Os06g0142600 | NA                                            | NA                            | NA                                                              | 1.00                                       | 9.95                                                 | 7.99                         | 0.35                                |
| <i>ELF4 chr.8</i>  | Os08g0366200 | 1.05E+06                                      | 24.39                         | 0.84                                                            | 0.22                                       | 10.00                                                | 2.09                         | 0.49                                |
| <i>ZTL1</i>        | Os06g0694000 | NA                                            | 29.89                         | 0.32                                                            | 1.00                                       | 2.11                                                 | 8.00                         | 1.70                                |
| <i>ELF4 chr.3</i>  | Os03g0410300 | 1.05E+06                                      | 30.00                         | 0.80                                                            | 0.61                                       | 2.11                                                 | 7.97                         | 2.25                                |

In parenthesis are symbols in the model description with search range. NA, not available. For the initial values, fixed to 0 in the final model. For the other parameters, the term is excluded in the final model.

**Supplemental Table 11. Parameters for the gated light response term.**

| Gene               | OsID         | Initial value<br>( $L_0$ ,<br>[0, $2^{20}$ ]) | Phase of<br>the gate<br>( $\rho_L$ , [0, $2\pi$ ]) | Amplitude<br>of the gate<br>( $g_L$ , [0, 1]) | Gain<br>( $a_L$ , [0, 30]) | Intercept<br>( $b_L$ , range<br>of the<br>relative<br>radiation) | Decay<br>( $k_L$ ,<br>[0,<br>$n(2)/60$ ]) |
|--------------------|--------------|-----------------------------------------------|----------------------------------------------------|-----------------------------------------------|----------------------------|------------------------------------------------------------------|-------------------------------------------|
| <i>PCL1</i>        | Os01g0971800 | 1.05E+06                                      | 0.08                                               | 0.178                                         | 0.0                        | 0.07                                                             | 4.43E-06                                  |
| <i>LHY chr.6</i>   | Os06g0728700 | NA                                            | 4.38                                               | 1.000                                         | 3.7                        | 0.00                                                             | 9.89E-04                                  |
| <i>LHY chr.2</i>   | Os02g0685200 | NA                                            | 3.16                                               | 1.000                                         | 30.0                       | 0.00                                                             | 1.12E-02                                  |
| <i>LHY</i>         | Os08g0157600 | NA                                            | 6.11                                               | 0.858                                         | 0.1                        | 0.60                                                             | 0.00E+00                                  |
| <i>LHY chr.4</i>   | Os04g0583900 | NA                                            | NA                                                 | NA                                            | NA                         | NA                                                               | NA                                        |
| <i>FKF1</i>        | Os11g0547000 | NA                                            | 5.06                                               | 1.000                                         | 2.1                        | 0.99                                                             | 6.98E-05                                  |
| <i>PRR95</i>       | Os09g0532400 | 3.96E+03                                      | 2.07                                               | 0.999                                         | 30.0                       | 0.76                                                             | 2.78E-06                                  |
| <i>PRR1</i>        | Os02g0618200 | NA                                            | 5.47                                               | 1.000                                         | 7.9                        | 0.00                                                             | 1.65E-04                                  |
| <i>ELF3 chr.1</i>  | Os01g0566100 | 1.05E+06                                      | 0.03                                               | 1.000                                         | 0.3                        | 0.49                                                             | 0.00E+00                                  |
| <i>Hd1</i>         | Os06g0275000 | NA                                            | NA                                                 | NA                                            | NA                         | NA                                                               | NA                                        |
| <i>PRR73</i>       | Os03g0284100 | NA                                            | 5.98                                               | 1.000                                         | 6.5                        | 0.00                                                             | 1.16E-02                                  |
| <i>PRR59</i>       | Os11g0157600 | NA                                            | 4.62                                               | 1.000                                         | 30.0                       | 0.86                                                             | 4.28E-05                                  |
| <i>GI</i>          | Os01g0182600 | NA                                            | 5.60                                               | 1.000                                         | 30.0                       | 0.07                                                             | 2.84E-03                                  |
| <i>PRR37</i>       | Os07g0695100 | NA                                            | 5.95                                               | 1.000                                         | 4.4                        | 0.00                                                             | 1.16E-02                                  |
| <i>PHYB</i>        | Os03g0309200 | 2.41E+05                                      | 3.35                                               | 0.993                                         | 0.7                        | 0.99                                                             | 1.73E-06                                  |
| <i>PHYC</i>        | Os03g0752100 | NA                                            | 1.81                                               | 1.000                                         | 30.0                       | 0.00                                                             | 1.15E-02                                  |
| <i>CRY1</i>        | Os04g0452100 | NA                                            | 4.25                                               | 0.893                                         | 30.0                       | 0.00                                                             | 3.07E-04                                  |
| <i>ELF4 chr.11</i> | Os11g0621500 | 4.22E+04                                      | 5.43                                               | 0.494                                         | 23.4                       | 1.00                                                             | 3.39E-03                                  |
| <i>PHYA</i>        | Os03g0719800 | NA                                            | 4.47                                               | 0.991                                         | 10.7                       | 0.00                                                             | 1.15E-02                                  |
| <i>CHE</i>         | Os02g0635800 | NA                                            | 4.63                                               | 1.000                                         | 18.5                       | 0.00                                                             | 5.83E-04                                  |
| <i>CRY2</i>        | Os02g0573200 | 3.44E+05                                      | 0.07                                               | 0.826                                         | 0.0                        | 0.91                                                             | 1.63E-06                                  |
| <i>ELF3 chr.6</i>  | Os06g0142600 | 9.83E+05                                      | 1.84                                               | 1.000                                         | 23.7                       | 0.60                                                             | 3.81E-09                                  |
| <i>ELF4 chr.8</i>  | Os08g0366200 | NA                                            | 6.28                                               | 1.000                                         | 16.5                       | 0.02                                                             | 1.15E-02                                  |
| <i>ZTL1</i>        | Os06g0694000 | NA                                            | 5.42                                               | 1.000                                         | 0.5                        | 0.01                                                             | 4.07E-04                                  |
| <i>ELF4 chr.3</i>  | Os03g0410300 | NA                                            | 3.43                                               | 1.000                                         | 30.0                       | 0.00                                                             | 1.42E-03                                  |

In parenthesis are symbols in the model description with search range. NA, not available. For the initial values, fixed to 0 in the final model. For the other parameters, the term is excluded in the final model.

**Supplemental Table 12. Parameters for the gated temperature response term.**

| Gene               | OsID         | Initial value<br>( $T_0$ ,<br>[0, $2^{20}$ ]) | Phase of<br>the gate<br>( $\rho_T$ , [0, $2\pi$ ]) | Ampulitude<br>of the gate<br>( $g_T$ , [0, 1]) | Gain<br>( $a_T$ , [0, 30]) | Intercept<br>( $b_T$ , range of<br>the relative<br>temperature) | Decay<br>( $k_T$ , [0,<br>$\ln(2)/60$ ]) |
|--------------------|--------------|-----------------------------------------------|----------------------------------------------------|------------------------------------------------|----------------------------|-----------------------------------------------------------------|------------------------------------------|
| <i>PCL1</i>        | Os01g0971800 | NA                                            | 0.00                                               | 0.951                                          | 23.3                       | 0.045                                                           | 1.15E-02                                 |
| <i>LHY chr.6</i>   | Os06g0728700 | NA                                            | 1.24                                               | 1.000                                          | 25.5                       | 0.000                                                           | 1.15E-02                                 |
| <i>LHY chr.2</i>   | Os02g0685200 | NA                                            | 2.27                                               | 0.871                                          | 6.7                        | 0.188                                                           | 3.14E-04                                 |
| <i>LHY</i>         | Os08g0157600 | NA                                            | 3.37                                               | 0.939                                          | 12.2                       | 0.417                                                           | 1.49E-04                                 |
| <i>LHY chr.4</i>   | Os04g0583900 | NA                                            | 1.68                                               | 1.000                                          | 16.8                       | 0.318                                                           | 1.16E-02                                 |
| <i>FKF1</i>        | Os11g0547000 | NA                                            | 6.06                                               | 0.956                                          | 15.9                       | 0.178                                                           | 4.63E-04                                 |
| <i>PRR95</i>       | Os09g0532400 | NA                                            | 2.21                                               | 1.000                                          | 24.4                       | 0.163                                                           | 1.15E-02                                 |
| <i>PRR1</i>        | Os02g0618200 | NA                                            | 1.35                                               | 1.000                                          | 5.8                        | 0.460                                                           | 2.22E-04                                 |
| <i>ELF3 chr.1</i>  | Os01g0566100 | NA                                            | 2.38                                               | 1.000                                          | 10.6                       | 0.000                                                           | 5.41E-05                                 |
| <i>Hd1</i>         | Os06g0275000 | NA                                            | 1.02                                               | 1.000                                          | 24.1                       | 0.356                                                           | 1.06E-03                                 |
| <i>PRR73</i>       | Os03g0284100 | NA                                            | 5.93                                               | 1.000                                          | 30.0                       | 0.411                                                           | 2.68E-04                                 |
| <i>PRR59</i>       | Os11g0157600 | NA                                            | 5.60                                               | 0.695                                          | 18.5                       | 0.157                                                           | 5.68E-04                                 |
| <i>GI</i>          | Os01g0182600 | NA                                            | 5.71                                               | 1.000                                          | 14.6                       | 0.416                                                           | 1.25E-04                                 |
| <i>PRR37</i>       | Os07g0695100 | NA                                            | 0.00                                               | 1.000                                          | 10.0                       | 0.530                                                           | 6.65E-04                                 |
| <i>PHYB</i>        | Os03g0309200 | NA                                            | 2.29                                               | 1.000                                          | 17.5                       | 0.154                                                           | 1.15E-02                                 |
| <i>PHYC</i>        | Os03g0752100 | NA                                            | 2.63                                               | 1.000                                          | 13.2                       | 0.458                                                           | 1.70E-04                                 |
| <i>CRY1</i>        | Os04g0452100 | 1.05E+06                                      | 3.51                                               | 1.000                                          | 30.0                       | 1.000                                                           | 1.41E-05                                 |
| <i>ELF4 chr.11</i> | Os11g0621500 | 4.46E+05                                      | 4.77                                               | 1.000                                          | 0.7                        | 0.559                                                           | 1.68E-05                                 |
| <i>PHYA</i>        | Os03g0719800 | NA                                            | 3.89                                               | 0.513                                          | 30.0                       | 0.008                                                           | 1.37E-04                                 |
| <i>CHE</i>         | Os02g0635800 | NA                                            | 4.44                                               | 0.690                                          | 1.8                        | 0.000                                                           | 1.16E-02                                 |
| <i>CRY2</i>        | Os02g0573200 | NA                                            | 1.29                                               | 0.677                                          | 30.0                       | 0.104                                                           | 1.13E-02                                 |
| <i>ELF3 chr.6</i>  | Os06g0142600 | NA                                            | 2.18                                               | 0.976                                          | 30.0                       | 0.762                                                           | 5.31E-06                                 |
| <i>ELF4 chr.8</i>  | Os08g0366200 | NA                                            | 1.95                                               | 0.619                                          | 30.0                       | 0.000                                                           | 1.69E-05                                 |
| <i>ZTL1</i>        | Os06g0694000 | NA                                            | 1.63                                               | 0.061                                          | 30.0                       | 0.154                                                           | 5.56E-04                                 |
| <i>ELF4 chr.3</i>  | Os03g0410300 | NA                                            | 0.80                                               | 0.056                                          | 30.0                       | 0.000                                                           | 3.39E-04                                 |

In parenthesis are symbols in the model description with search range. NA, not available. For the initial values, fixed to 0 in the final model. For the other parameters, the term is excluded in the final model.
